# Supplementary material for: Man-made microbial resistances in built environments
Source: PubMed Central journal article supplement (PMC6393488; doi:10.1038/s41467-019-08864-0), 2019-02-27
Supplement: 41467_2019_8864_MOESM1_ESM.pdf [file 41467_2019_8864_MOESM1_ESM.pdf]

**Supplementary Information to:**

Man-made microbial resistances in built environments

Alexander Mahnert<sup>1\*</sup>, Christine Moissl-Eichinger<sup>2, 3</sup>, Markus Zojer<sup>4</sup>, David Bogumil<sup>5</sup>, Itzhak Mizrahi<sup>5</sup>, Thomas Ratter<sup>4</sup>, José Luis Martínez<sup>6</sup> and Gabriele Berg<sup>1, 3</sup>

<sup>1</sup>Institute of Environmental Biotechnology, Graz University of Technology, Graz, Austria

<sup>2</sup>Department of Internal Medicine, Medical University Graz, Austria

<sup>3</sup>BioTechMed Graz, Graz, Austria

<sup>4</sup>Division of Computational Systems Biology, Department of Microbiology and Ecosystem Science, University of Vienna, Austria

<sup>5</sup>Department of Life Sciences, Faculty of Natural Sciences, Ben-Gurion University of the Negev, Israel

<sup>6</sup>Centro Nacional de Biotecnología, CSIC, Madrid, Spain

\*Correspondence:

Alexander Mahnert

Institute of Environmental Biotechnology

Graz University of Technology

Graz, Austria

alexander.mahnert@gmail.com

## Supplementary Methods

Detailed description of sampled built environments:

Public buildings as well as public and private houses located in the rural area of a wildlife park (in close touch with nature in Eekholt, Germany) represented the model for a totally unrestricted built environment (UB, Supplementary Fig. S19). The intensive care unit (ICU, Department of Internal Medicine, University hospital, Graz, Austria, Supplementary Fig. S20) in full operation and in a suburban area, act as a model for confined built environments (CB) with special attributes of its occupants <sup>1</sup>. Finally, a highly confined indoor environment (CB) was represented by a cleanroom facility <sup>2</sup> with its adjacent gowning area used for spacecraft assembly by the European Space Agency (ESA) in the urban area of Turin, Italy (Supplementary Fig. S21). Samples throughout these different built environments were obtained from floors to allow a high grade of comparability and sufficient biomass for the applied methods. In addition, samples from ICU floor surfaces were compared with samples from other ICU locations as well, using a targeted approach of the 16S rRNA gene. We also tried to reduce potential technical effects (sampling procedures, DNA extractions, sequencing run effects) as well as distortive environmental effects (sampling season and room locations) by a consistent experimental design and numerous controls throughout our study <sup>3-5</sup>. Such precautions minimize technical differences in our study that could overlay actual biological effects <sup>4</sup>.

In particular the following environmental influences should be considered for each sampled category:

The natural unrestricted indoor environment of public and private buildings and houses in a rural area were exposed to the highest degree to the surrounding outdoor environment. A variety of discrete landscapes with respectively associated ecosystems surrounded these structures – including bogs, wetlands, coniferous and deciduous wooded forests with a winding creek in grasslands and pasture including > 700 animals in ~100 different species of insects, fish, reptiles, birds and mammals ([www.wildpark-eekholt.de](http://www.wildpark-eekholt.de)).

The public buildings were located in all these different ecosystems. During the business hours of the wildlife park (from 9 am to 6 pm) these buildings were wide apart for a microbial input via the outdoor air (pollen, seeds, water droplets and other biotic and abiotic particles and compounds)

and various animals (insects, birds, mammals, humans and their pets) with brought along particles associated to soil, foods (snacks), and personal items (e.g. buggies etc.). The rooms of these structures were window ventilated or simply wide apart. Floor surface materials comprised concrete, tiles, polymers and wood. In contrast to the other sampled indoor environments the floors were cleaned only mechanically with a broom and people interacted only marginally with the floor environment, since they primarily observed wildlife, studied boards about the presented ecosystem or simply seek for shelter due to unfavorable weather conditions.

The public houses were so-called ‘A-frame houses’ surrounded by lawns, conifers and deciduous trees adjoining to broad fields of farmland. The houses comprised a recreation room (wooden floor), a kitchen and restrooms (tiled floors). Especially the floor surfaces of the kitchen and the restrooms were treated regularly with natural soaps and were also affected (food preparation, conducting daily hygiene) in a different way compared to the previous category of public buildings. The public houses were used by school classes, who occupied the rooms for a week to receive environmental education. Houses were closed during absence of occupants and window ventilated in the presence of pupils or the cleaning staff.

While a public house is frequented by numerous temporary residents, the private house in contrast is usually inhabited by a family or a reduced number of residents. Likewise, daily behavior and interaction with surfaces is highly personalized. Hence, compared to public houses, this personalized maintenance represents a first step of confinement of an indoor environment. The sampled private house was an old farmyard encircled by a garden with fruit trees and conifers of the adjacent forest. Sampled rooms comprised a kitchen (floor with polymer tiles), a barn mainly used for dining with guests (stone floor) and a conference and locker room (tiled floor) in an adjacent building used as a bird foster station. The house was window ventilated and occupied by the co-founder of the wildlife park - an elderly women and her dog. The resident was supported by a household help and regularly visited by employees of the wildlife park. Floors were cleaned with all-purpose cleaners, the dog received its food in a bowl in the kitchen and the barn was inhabited by swallows during the summertime. Due to the high frequentation of occupants it was uncommon to change shoes before entering the private house (in contrast to many other private households). The same behavior was true for the public built environments described above.

On the contrary to these UB environments, the investigated ICU was located in a suburban area. Compared to public buildings, public and private houses, indoor environments of hospitals are severely different in many aspects: First of all beside staff the majority of people are suffering from

severe infections and other health problems. Therefore these patients might deliver specific microbes like opportunistic pathogens to their surroundings or acquire problematic germs from it. In this ICU critically affected patients suffering from all subspecialties of internal medicine and neurologic defects were treated in 15 beds including an isolation unit for severe immunocompromised patients. All rooms of the ICU were mechanical ventilated by an air conditioning system. Access to the ICU was restricted and controlled by the medical staff. Special garment regulations were applicable in dependence on the grade of interaction with patients or medical devices. A comprehensive maintenance, cleaning and disinfection plan especially characterizes this indoor environment: Waste was removed three times a day and waste containers were disinfected with a surface disinfection cleaner. In the same manner doorknobs and tiles in working height were cleaned twice per day. All-purpose cleaners were used to treat free surfaces and furniture (shelves, chairs, tables, conduits, window boards, radiators, elevators), a surface disinfectant was used for dirty laundry buckets, handrails, cleaning cars, surface cleaning devices and sanitary glass cleaners and surface disinfectants were used at the bath place for showers and sinks once a day. All other furniture, objects or room installations were cleaned weekly, monthly, per quarterly period, semiannual or annually. Beside restrooms and shower heads all floors were cleaned twice a day or even more often if visible contaminants (blood, feces or other secreted liquids) were observed. If known hospital germs (e.g. *Clostridium difficile*) were detected additional hygiene protocols became effective up to individual isolation of patients. A detailed list of all cleaning products used for disinfecting hands, surfaces, instruments or antisepsis of skin and mucosa are listed in Supplementary Table 4 and Supplementary Table 5 beside other agents to treat known resistant hospital germs and viruses.

An additional level of microbial control is realized in cleanrooms during spacecraft assembly, especially if a celestial body with relevance to extraterrestrial life detection is targeted. According to planetary protection regulations <sup>6</sup> these spacecraft are not only assembled in cleanrooms, but are also subject to regular microbial monitoring, cleaning and removal of surface associated microbes (bioburden control and countermeasures) <sup>7</sup>. Most microbes are intensively reduced not only by the low water and nutrient availability, but especially through intensive HEPA air filtration and the reduction of air-borne particles through air recirculation. Hence, cleanrooms are categorized into different cleanroom classes by the amount and size of particles. Moreover, type and quality of gaseous substances, temperature, humidity, electromagnetics, electrostatics etc. can be controlled. Low emitting surfaces and materials (e.g. floors, doors, door handles, tables, shelves, trolleys) are

mopped with sterile cloths to remove dust, before surfaces are cleaned several times a day with alcohols (e.g. 70% isopropanol), detergents based on hydrogen peroxide (e.g. Klercide-CR), high alkaline cleaning reagents (e.g. Jaminal Plus or Kleenol 30) and sometimes even with vapor-phase hydrogen peroxide or cold plasmas to reduce the bioburden of spacecraft. However, due to the complexity of working processes during spacecraft assembly, engineers still have to interact with spacecraft components and are therefore a main source of microbial dispersal. As a counter measurement strict gowning protocols with special cleanroom garment have to be followed in repetitive steps and sluices and air showers define transitions through different cleanroom classes and rooms. Finally strict protocols (e.g. slow body movements) regulate the interaction of engineers and staff with the cleanroom environment, spacecraft components and the assembled spacecraft itself to minimize the dispersal of human associated microbes into the cleanroom.

All sampled built environments could be characterized by distinct environmental features such as the geographic location, microclimate, architecture, room maintenance and usage (Table 1). Whereas samples from unrestricted environments were located at low elevations in northern Germany, samples from confined built environments originated from higher altitudes in south-east Austria and north-west Italy. Concerning respective microclimates, unrestricted environments of public buildings and public as well as private houses were specified by higher relative air humidity and lower temperatures, compared to controlled environments of the ICU, and the cleanroom facility with its gowning areas. The ICU highlighted most opposed climatic conditions: with the highest room temperature (24°C) and the lowest relative air humidity (32%). Further discriminating attributes were represented by architectural features of sampled built environments. Here, cleanrooms represented very large indoor room surfaces compared to small spaced infrastructure in the case of gowning areas, rooms in the ICU, public buildings and public and private houses. The smallest room volumes were represented in private houses. Likewise, more controlled built environments harbored only a few defined synthetic materials on floors, compared to a higher variety of floor materials including materials of natural sources like wood and stone in unrestricted built environments. Moreover, occupancy and intensity of cleaning were obviously different between public buildings, public and private houses, the ICU and the cleanroom facility with its gowning areas. Hence, a higher grade of environmental confinement resulted in more elaborative maintenance and cleaning procedures, but a lower grade of occupancy.

#### Sample processing:

Alpha Wipes® (TX1009, VWR International GmbH, Vienna, Austria) were extracted in 40 mL 0.9% sterile DNA-free sodium chloride solution by vortexing for 10 seconds and sonication at 40 kHz for 2 min in an ultrasonic bath (Transonic Digital, Elma, United States). Extracted sampling liquids were concentrated by repeated centrifugation cycles at 3220 g and 4°C for 5 min using UV sterilized Amicon filter tubes (Amicon Ultra-15 Centrifugal Filter Units, Merck, Germany) to a final volume of 500 µl.

#### PMA treatment of samples:

An aliquot of selected biological samples and spot tests of used reagents were treated with propidium monoazide (PMA) according to manufacturer instructions (GenIUL, S.L., Terrasa, Spain). Samples were treated with a final concentration of 50 µM PMA for 30 min. in the dark. Afterwards treated and non-treated samples were exposed in parallel to the PhAST blue-Photo activation system for tubes (GenIUL, S.L., Terrasa, Spain) for 15 min.

#### DNA extraction:

The DNA extraction procedure included mechanical, thermal and chemical lysis of the cells. All cell suspensions were homogenized with a FastPrep-24 Classic Instrument (MP Biomedicals, United States) in two cycles for 30 seconds at 6.5 m/s. Homogenized samples were then added to an equal volume of freshly prepared XS buffer (2x). A ~20 ml stock solution of the XS buffer (2x) contained: 4 ml of 1M Tris/HCl (pH 7.4); 4.56 ml of 7M ammonium acetate; 3.2 ml of 250 mM ethylene diamine tetraacetic acid; 4 ml of 10% (w/v) sodium dodecyl sulfate; 0.4 g of potassium ethyl xanthogenate; and 4.99 ml of PCR-grade water. The XS buffer was incubated at 65°C for 15 min. to dissolve the xanthogenate completely. The homogenized cell suspension in the XS buffer was incubated at 65°C for 2 hours and gently mixed by inverting the tube every 30 min. After the incubation period, the tubes were vortexed for 10 seconds and placed on ice for 10 min, followed by centrifugation at 100 g and 4°C, for 5 min. The supernatant was transferred into a PhaseLock Gel tube (Eppendorf, Hamburg, Germany), and an equal volume of phenol: chloroform:isoamyl alcohol (25:24:1) was added. Sample suspensions were mixed and centrifuged at 2000 g and 15°C for 5 min. The upper aqueous layer was transferred into a new tube. For DNA precipitation, the same volume of cold 100% isopropanol and 1/10 volume of 4M ammonium acetate was added. Suspensions were gently mixed and incubated at -20°C overnight. On the next day the precipitated

DNA was centrifuged at 13600 g and 4°C for 30 min. Invisible DNA pellets were washed with 1 ml of ice-cold 70% ethanol and centrifuged again at 13600 g and 4°C for 30 min. DNA pellets were dried completely in a clean bench and finally dissolved in 50 µl of PCR-grade water.

#### qPCR:

Quantitative molecular measures were based on the primer pair 515F – 927R (10µM each, Supplementary Table 6). For the qPCR run DNA templates were amplified in 40 cycles with denaturation at 95°C for 20 sec., annealing at 54°C for 15 sec. and elongation at 72°C for 30 sec. on a Rotor-Gene™ 6000 real – time rotary analyzer (Corbett Research, Sydney, Australia). A melt curve from 72°C to 95°C served as a quality control for the amplified products. One qPCR reaction mix was constituted as follows: 1.06 µl PCR grade water, 3.5 µl KAPA Plant PCR buffer (KAPA3G Plant PCR Kit, Peqlab, VWR International GmbH, Erlangen, Germany), 0.42 µl forward and reverse primers, 0.056 µl of KAPA3G Plant DNA-polymerase (2.5 u per µl), 0.78 µl of SYBR® Green (4x concentrate, Invitrogen™, Eugene, OR, USA), and 0.8 µl of the extracted DNA template. qPCR runs with a mean reaction efficiency of 0.84 and mean standard curve R<sup>2</sup> values of 0.99 (16S rRNA gene product of *Bacillus subtilis* B2G) were evaluated in triplicate and counts in negative controls were subtracted from all other samples in their respective qPCR runs.

#### Plasmidome assembly methods:

The plasmidome of each sample was assembled using the recycler pipeline <sup>8</sup>. Paired end reads were assembled de novo into contigs and the assembly graph, connecting these contigs via shared kmers, was obtained using SPAdes <sup>9</sup>. In order to calculate the read coverage for each contig from the assembly, paired end reads were aligned to the contigs using the Burrows-Wheeler aligner (BWA) <sup>10</sup>. Contigs were subsequently assembled into cycles defined by connectivity in the assembly graph from the de novo assembly and uniform coverage distribution around the circular combination of contigs, using the recycler Software <sup>8</sup>. Plasmid encoded open reading frames (ORFs) were then predicted upon these cycles using Metagenemark <sup>11</sup>. Annotation of ORFs was performed by blast+ <sup>12</sup> searches against the KEGG FTP release 2017-03-27 database <sup>13</sup>, the Uniref90 release 2016\_10 database <sup>14</sup> and the CARD 1.1 database <sup>15</sup>.

### Synteny analysis:

The genomic context of resistance genes (20 kb, 10 kb up -and downstream), pan-genomes, and virulence was analyzed in MaGe <sup>16</sup>. Annotation of virulence factors was based on VFDB <sup>17</sup> and VirulenceFinder <sup>18</sup>. Pan-genomes were calculated with the SiLiX software <sup>19</sup>. IntegronFinder <sup>20</sup> was applied to detect integron clusters. Regions of genome plasticity (RGP) were based on PkGDB organisms and NCBI RefSeq organisms showing highest similarity with the query genome by using RGP Finder and the tools AlienHunter <sup>21</sup> and SIGI-HMM <sup>22</sup>.

### 16S rRNA gene amplicons:

Four individual PCR reactions à 50 µl (17.6 µl PCR grade water, 25 µl KAPA Plant PCR buffer, 0.4 µl KAPA3G Plant DNA-polymerase (2.5 u per µl), 3 µl forward and reverse barcoded primers 515f and 806r (Supplementary Table 6) and 1 µl extracted DNA template) were pooled after successful amplification (40 cycles of 95°C for 30 sec. denaturation, 60°C for 15 sec. annealing and elongation at 72°C for 12 sec.) on a TECHNE TC-PLUS gradient thermocycler (Bibby Scientific Ltd, Stone, UK) and validated by gel electrophoresis. Pooled PCR products were cleaned with the Wizard SV Gel and PCR Clean-Up System kit (Promega, Madison, WI, USA) and measured on the NanoDrop instrument (Thermo Scientific, Wilmington, DE, USA). Equimolar concentrations of PCR amplicons were pooled and sent for sequencing at Eurofins Genomics GmbH, Ebersberg, Germany. The pool was additionally purified by gel extraction and quantified before the sequencing library was prepared by adaptor ligation, PCR amplification according to PCR product insert size and a final library purification and quality control. Sequencing of amplicon samples was performed on an Illumina MiSeq instrument with v3 chemistry and the 2 x 300 bp paired-end read module. Amplicon sequences of the ICU were generated and sequenced as described in <sup>1</sup>.

### 16S rRNA gene amplicon data analysis:

Sequences of 16S rRNA gene amplicons of all indoor environments were analyzed in QIIME 1.9. and QIIME 2 (versions 2017.10 to 2018.11) <sup>23,24</sup>, according to <sup>25,26</sup> and developer provided tutorials. Forward and reverse reads were joined with a minimum overlap of 100 bp and a maximum allowed difference of 3%. Barcodes were extracted for demultiplexing and quality filtering of reads with default parameters. Reads in controls were removed by blast (100% alignment cutoff). 454 reads



of ICU samples were denoised with mothur<sup>27</sup>, demultiplexed and quality filtered before they were concatenated with the filtered Illumina reads. All sequences were then trimmed to the same 16S rRNA gene regions and lengths (FASTX-toolkit by Assaf Gordon, accessed on Galaxy, galaxyproject.org). Reads were additional quality filtered to remove primer sequences before chimeric sequences were removed with USEARCH<sup>28</sup> giving both Silva 119 and the Greengenes 13\_8 release as a reference. OTUs were picked with USEARCH to the same reference and every sequence not present was clustered denovo at 97% similarity level. For phylogenetic based metrics and measures a phylogenetic tree was calculated. The OTU table was filtered for singletons, doubletons, assigned reads to chloroplasts or mitochondria and sorted for following read normalizations in alpha and beta diversity analysis and statistics. Since jackknife supported bootstrapped trees showed higher confidence for weighted than unweighted unifrac measures, weighted metrics were preferred throughout the analysis as also recommended by<sup>3</sup>. OTUs present in the reference were examined for their functional potential with PICRUSt<sup>29</sup>. Potential microbial phenotypes were predicted with BugBase<sup>30</sup>. OTU networks were based on the assigned taxonomy, calculated in QIIME and visualized in Cytoscape<sup>31</sup> as described earlier<sup>32</sup>. Sample metadata predictions were based on random Forest classification and regression<sup>33</sup>. Associations between microbial composition and environmental variables were assessed by bioenv analysis<sup>34</sup> and verified by multivariate linear models using MaAsLin<sup>35</sup>, balances in gneiss<sup>36</sup> and linear mixed effects<sup>37</sup>.

#### Statistics on sequencing reads:

3.0 - 6.7 x 10<sup>7</sup> sequences per sample could be obtained via shotgun Illumina HiSeq sequencing. After filtering, a range of 7 x 10<sup>6</sup> to 2.5 x 10<sup>7</sup> quality sequences (phred score ≥ q36) could be retained for following assemblies and binning attempts (Supplementary Table 7). Assemblies on Ray Meta resulted in a satisfying amount of small (≥ 100 nt) and large (≥ 500 nt) contigs and scaffolds (range of N50 values: 142 to 2510, Supplementary Table 8). From these contigs and scaffolds 125 bins (8 to 20 bins per sample) could be generated. Most bins were obtained from the private house, while only a few genomes could be binned from the ICU dataset (Supplementary Table 2). In general, most markers (1389) and marker sets (369) could be binned into 39 genomes assigned to the genus *Pseudomonas* with a completeness of 93.47%, contamination of 2.51%, and heterogeneity of strains of 26.67%.

Supportive 16S rRNA gene amplicon analysis for higher resolutions of respective built environment locations resulted in 225 to 37,831 sequences per sample from a total of 837,216 quality sequences and 10,814 assigned OTUs (Supplementary Table 10, Supplementary Table 11 and Supplementary Table 12).

Verification of bioenv results:

Associations of the microbiome with microclimate or location specific variables could not be further distinguished. MaAsLin was able to define specific taxa (distinct sets, only 6 of 82 were overlapping) for microclimate and location specific variables (e.g. microclimate: *Bauldia*, *Gaiella* and *Intrasporangium*; location: *Commensalibacter*, *Chlorocromatium*; both: *Iamia*, *Rubrobacter*). However, regression models using balances in gneiss showed that microclimate and location dependent variables contributed to similar proportions (~2%) to the total explained community variation (~70%). Moreover over-fitting of the model could not be ruled out (in 4 out of 6 cross-validations the prediction accuracy was higher than the within model error). Finally, linear mixed effect models were used to test if microbial composition changed over microclimate or location in response to confinement and architecture (room size). This analysis showed that microbial composition was not significantly impacted by these selected variables. Hence, we concluded that environmental variables of the microclimate and the location were confounded in our sample design and were not appropriate to tell if the microclimate or the location has a bigger impact on the microbial composition.

Supplementary Figures

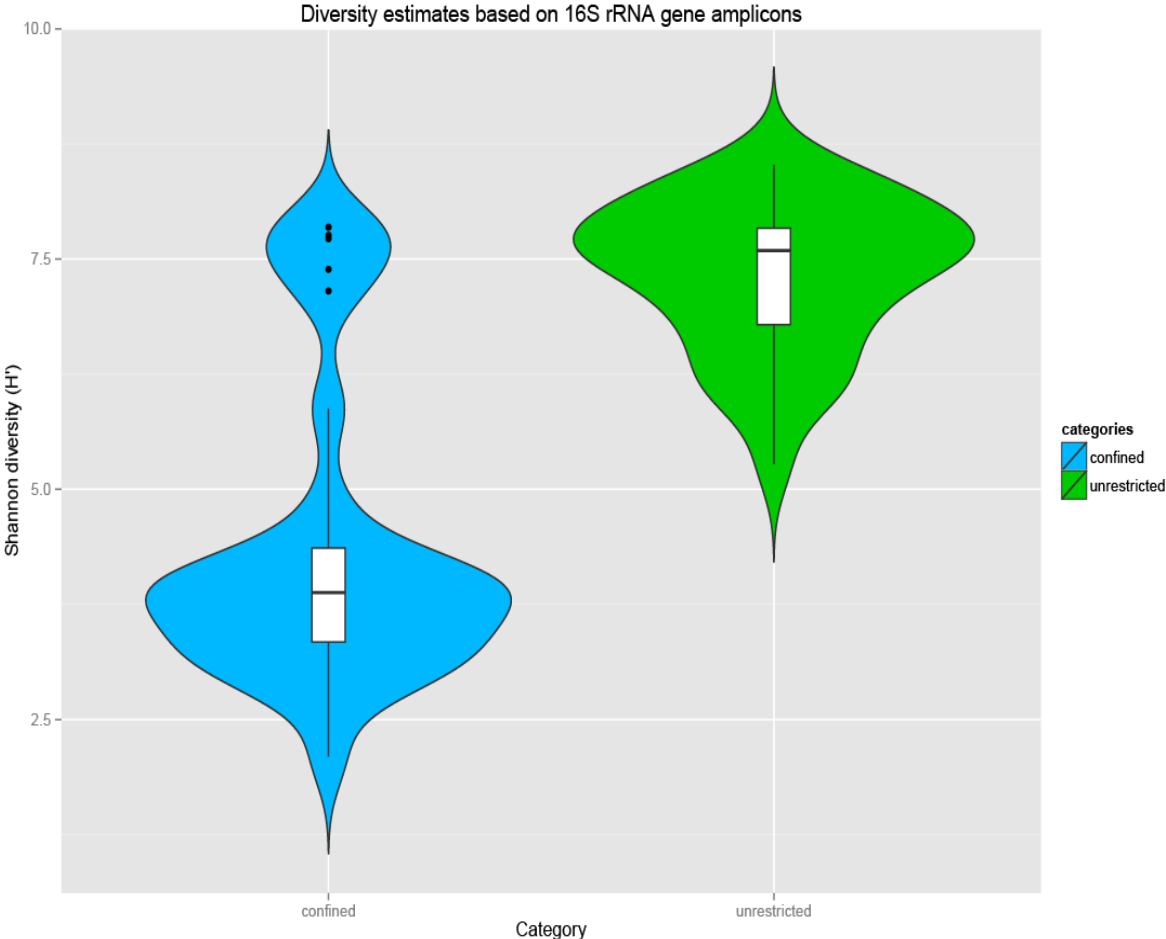

Supplementary Figure 1: **Diversity estimates**

Diversity estimates of confined and unrestricted built environments based on 16S rRNA gene amplicon analysis.

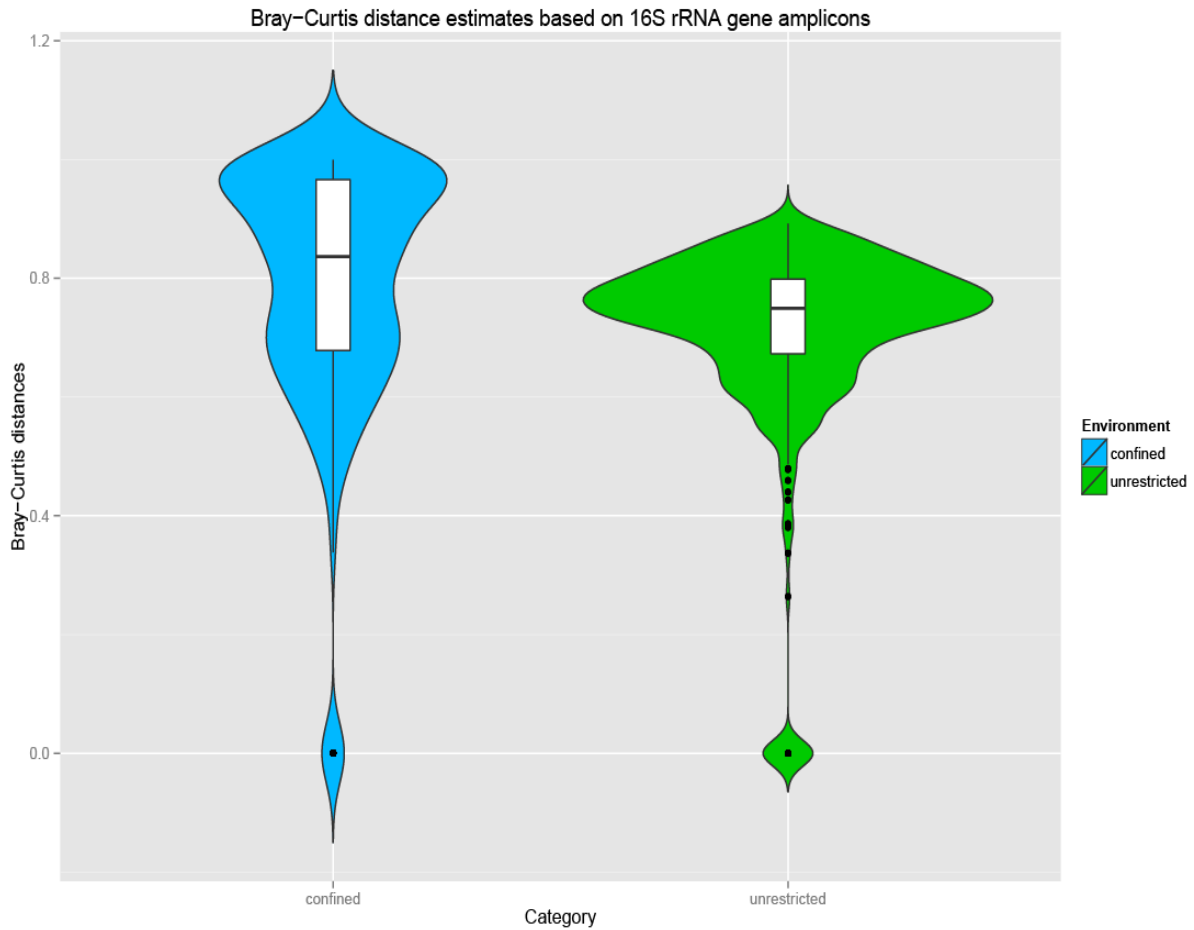

Supplementary Figure 2: **Distance estimates**

Bray-Curtis distance estimates of confined and unrestricted built environments based on 16S rRNA gene amplicon analysis.

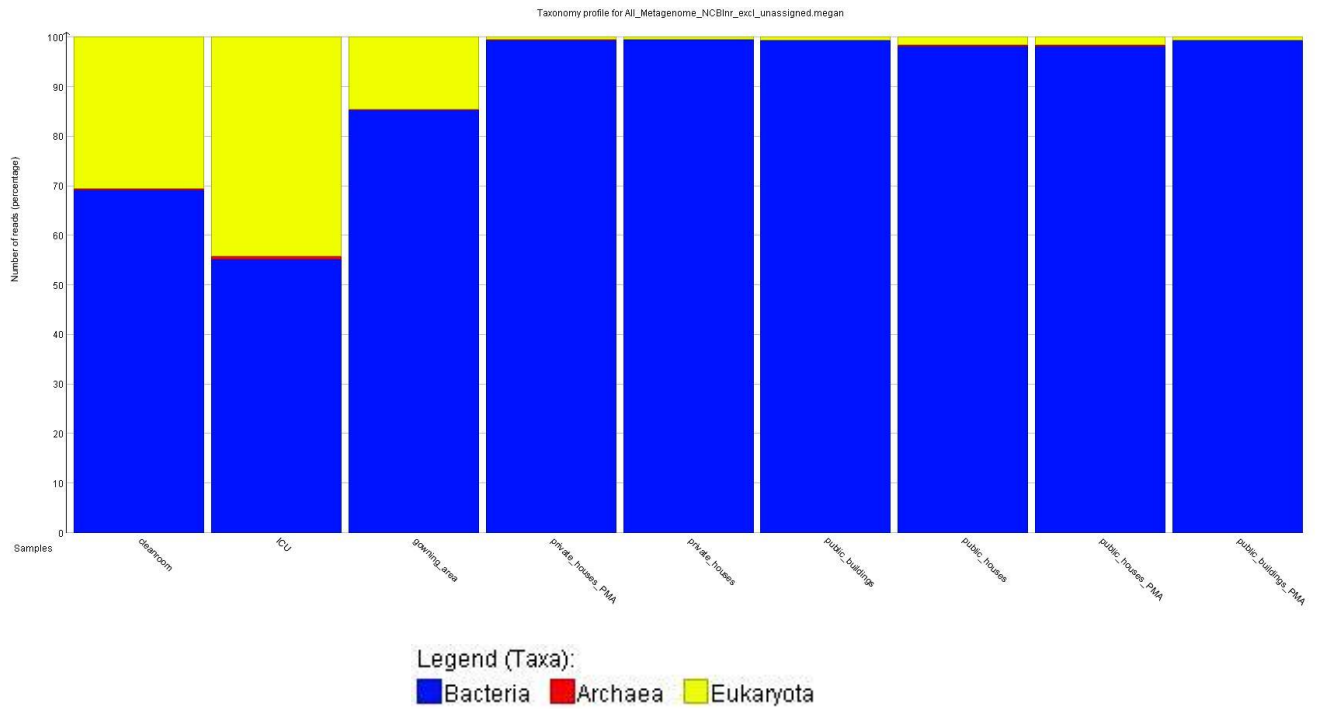

Supplementary Figure 3: **Domain profile**

Single reads BLASTx (rapsearch and diamond) vs. NCBI nr. superkingdom level (derived from MEGAN, excluding unassigned reads, normalized data set).

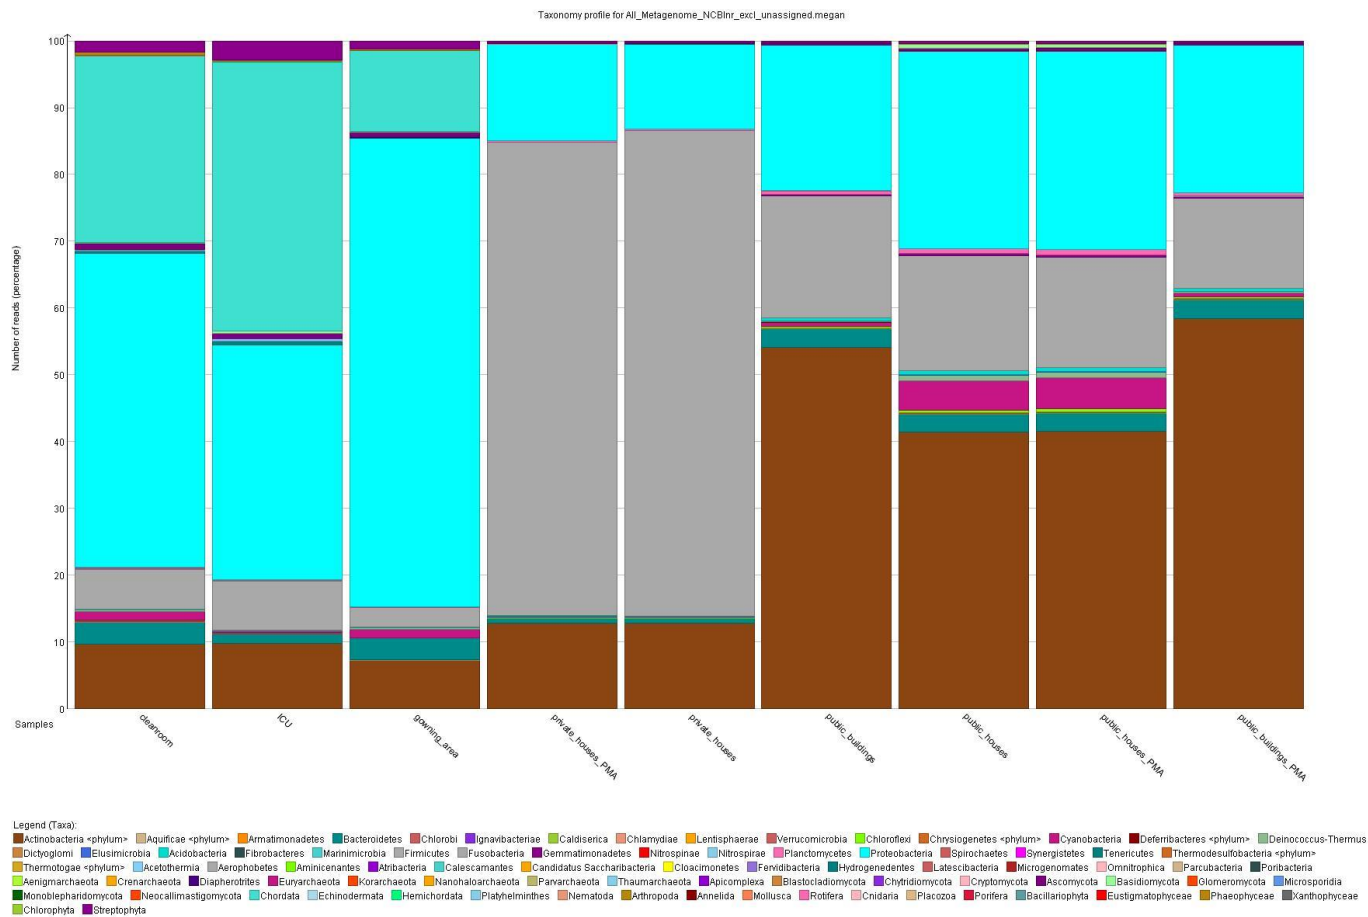

### Supplementary Figure 4: Phyla profile

Single reads BLASTx (rapsearch and diamond) vs. NCBI nr. phylum level (derived from MEGAN, excluding unassigned reads, normalized data set).

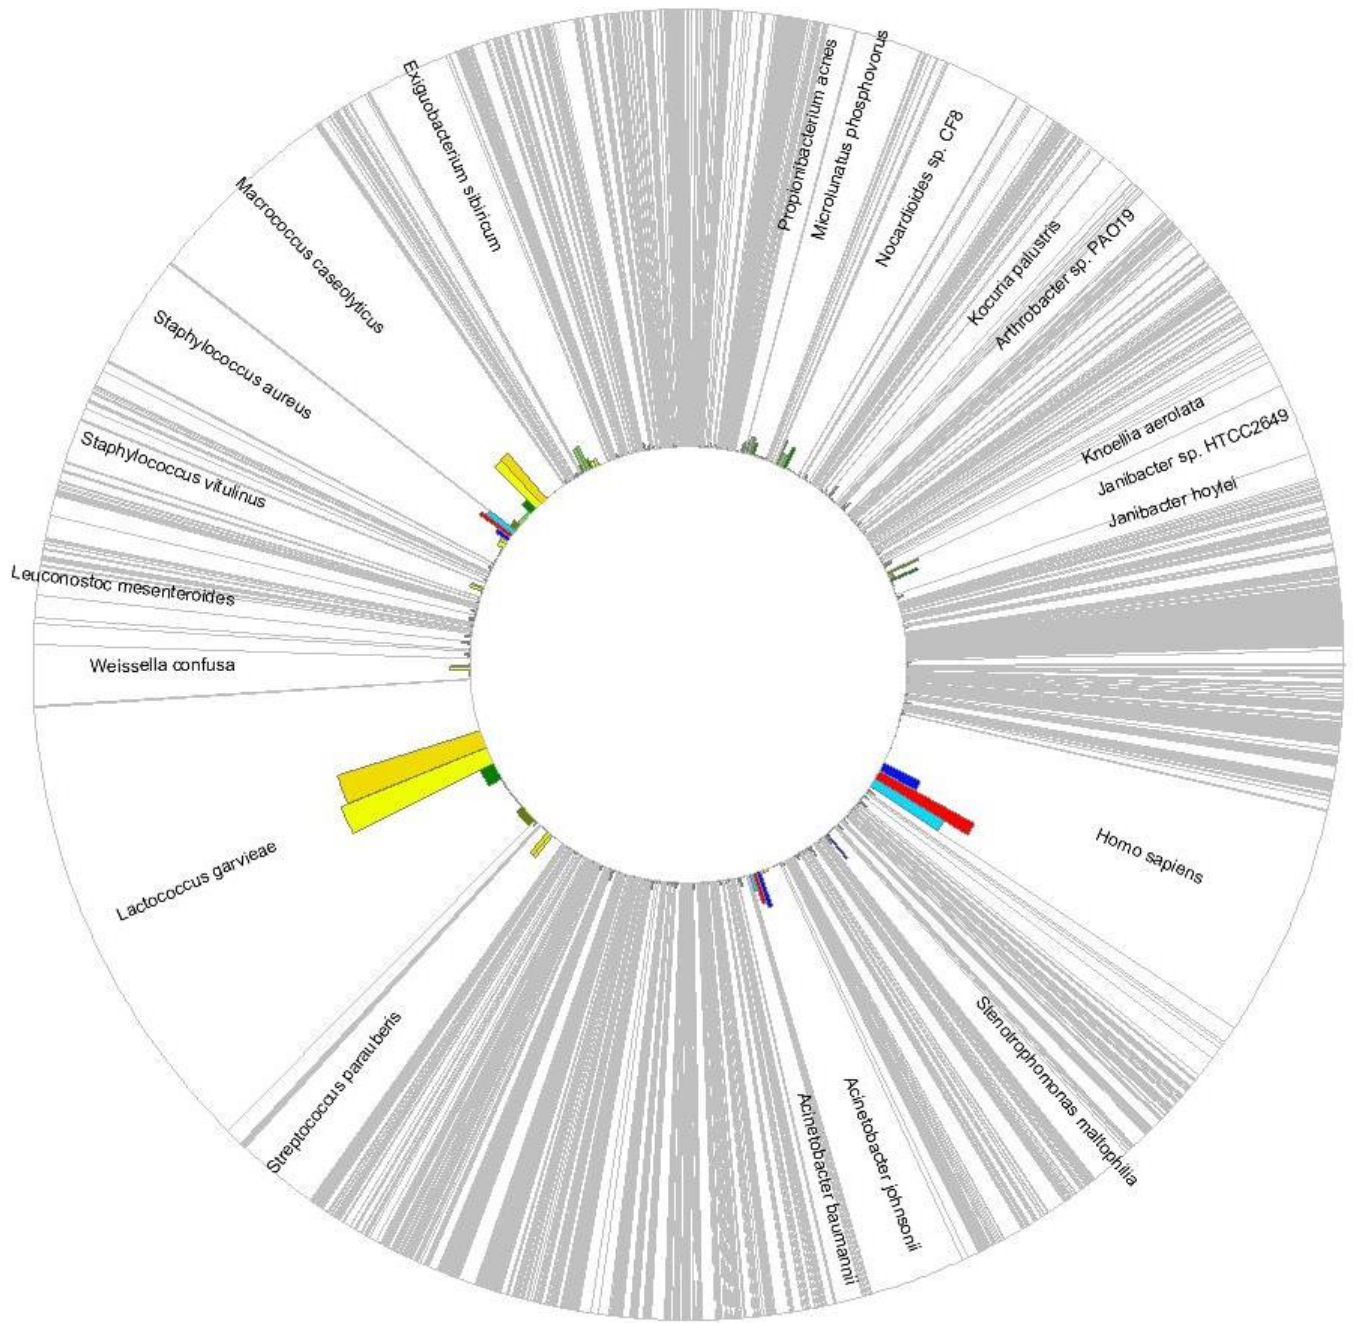

Legend (Samples):

■ cleanroom 
 ■ ICU 
 ■ gowning\_area 
 ■ private\_houses\_PMA 
 ■ private\_houses 
 ■ public\_buildings 
 ■ public\_houses 
 ■ public\_houses\_PMA 
 ■ public\_buildings\_PMA

### Supplementary Figure 5: **Species profile**

Space filling radial chart of taxa (species level, excluding unassigned reads, normalized, percentage) assigned (BLASTx NCBI nr, diamond and rapsearch) to different built environments (MEGAN).

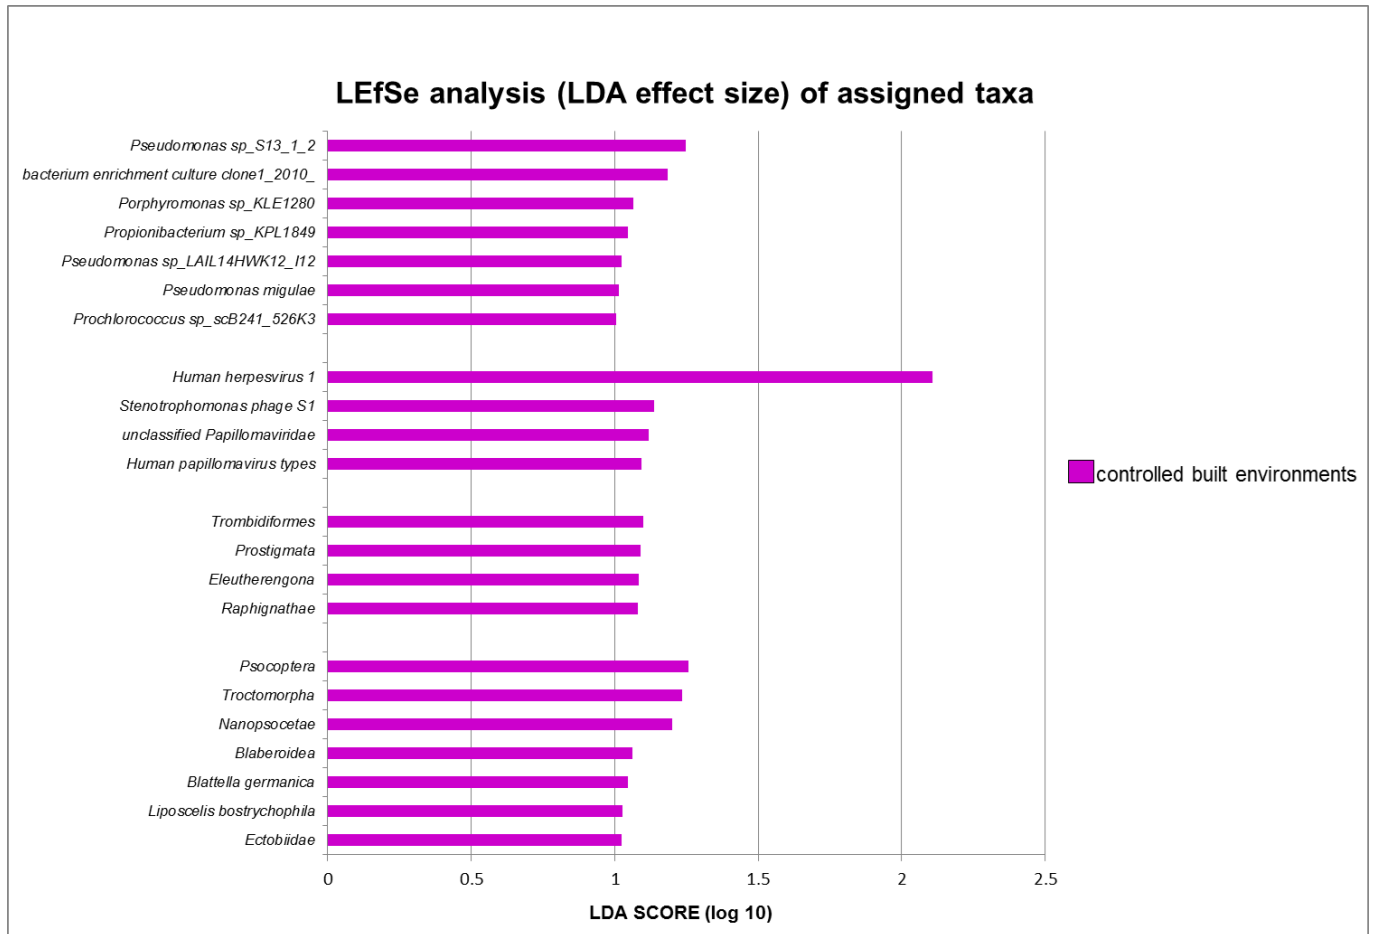

**Supplementary Figure 6: Distinctive taxa of controlled built environments (CB)**

LefSe analysis (LDA effect size) on taxa (according to NCBI database) of single reads from metagenomes of CB (ICU, gowning area, cleanroom) and UB (public buildings, public and private houses) built environments with the following parameters: per-sample normalization to 1M, factorial Kruskal-Wallis test among classes (alpha = 0.01), pairwise Wilcoxon test between subclasses (alpha = 0.01), threshold for the LDA score (1.0), strategy for multi-class analysis (all-against-all, more strict).



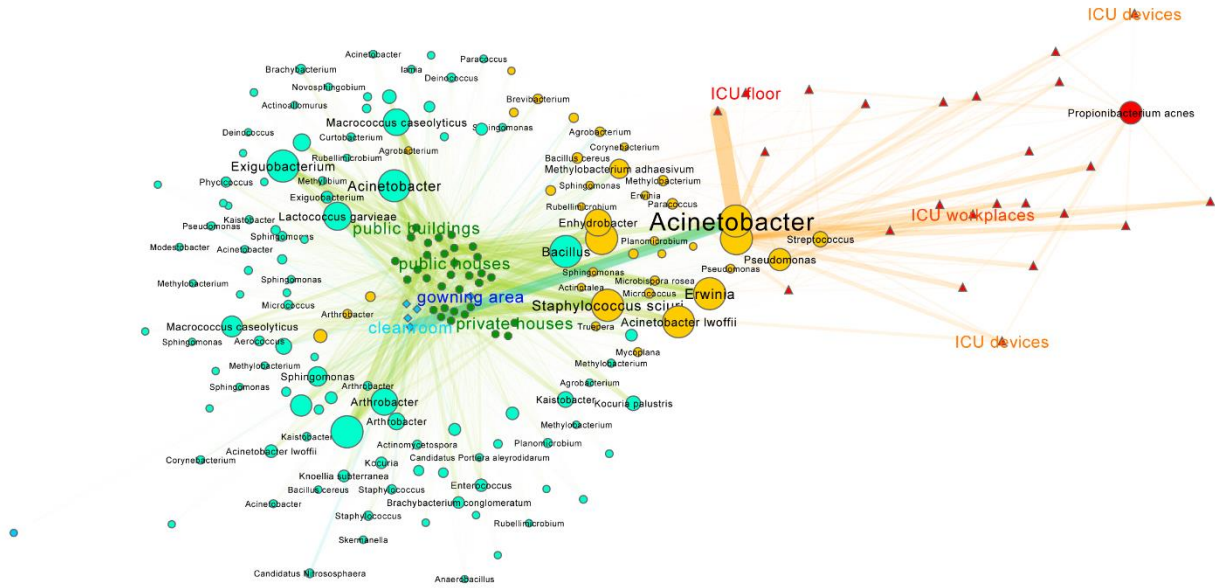

### Supplementary Figure 7: Core microbiome

Core OTU network based on G-tests for independence of 16S rRNA gene amplicons resolved to genus level. Edge-weighted spring embedded algorithms implemented in Cytoscape were used for visualizations. OTU abundance is reflected by node size. Edge weights by line widths and opacities. Colors refer to different sampled built environments: Cleanroom facility (blue), intensive care unit (red), public buildings, public houses, private houses (all in green).

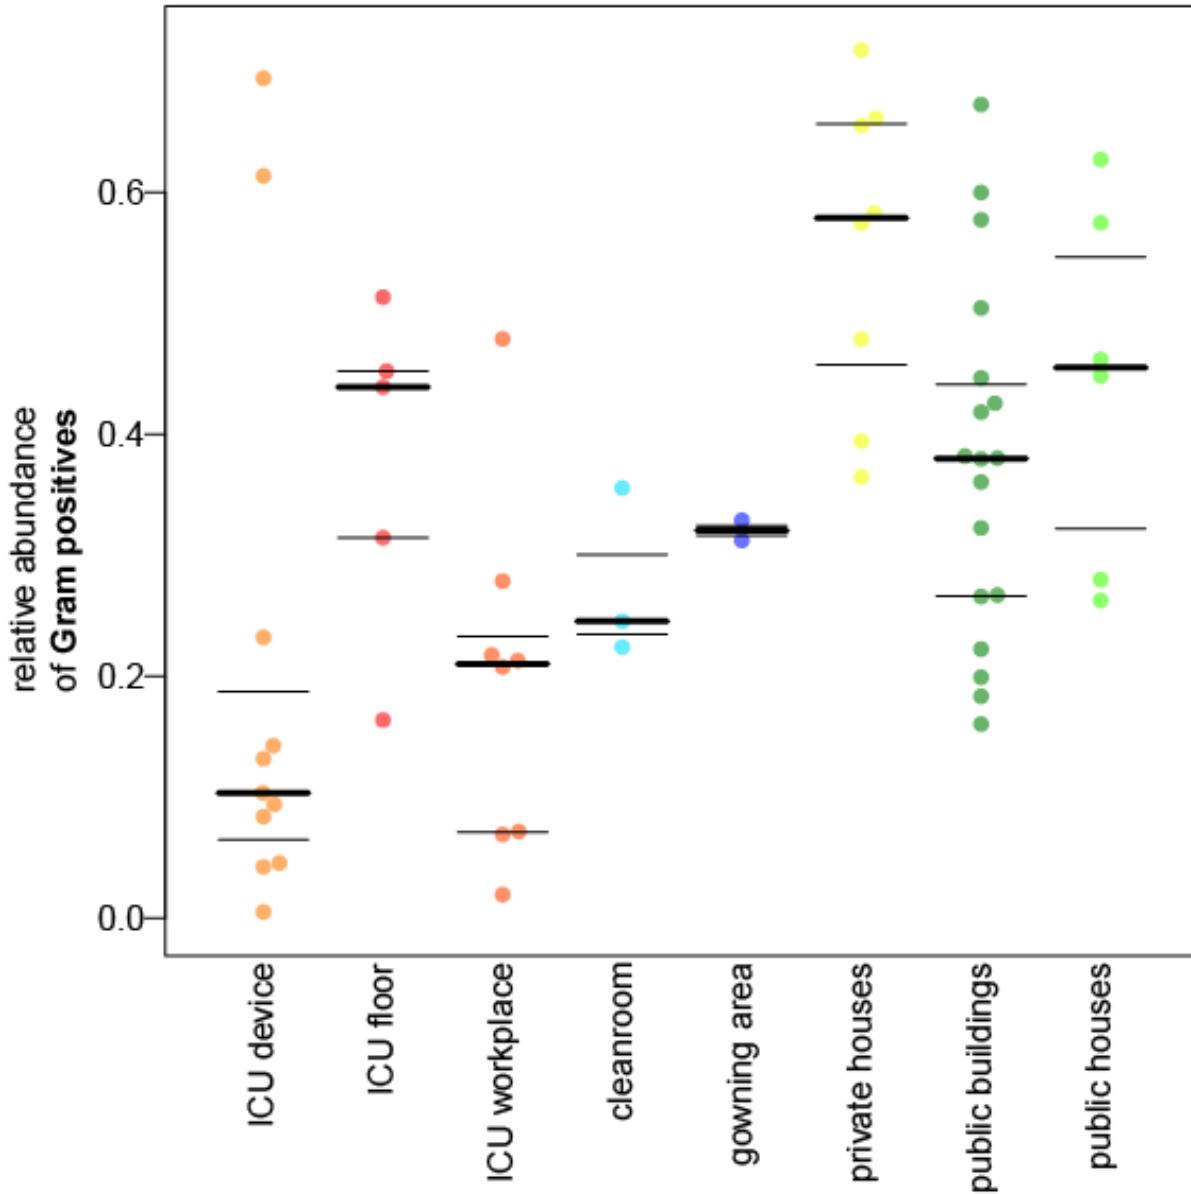

Supplementary Figure 8: **Gram positive bacteria**

Phenotype prediction of Gram positive bacteria based on 16S rRNA gene amplicon analysis.

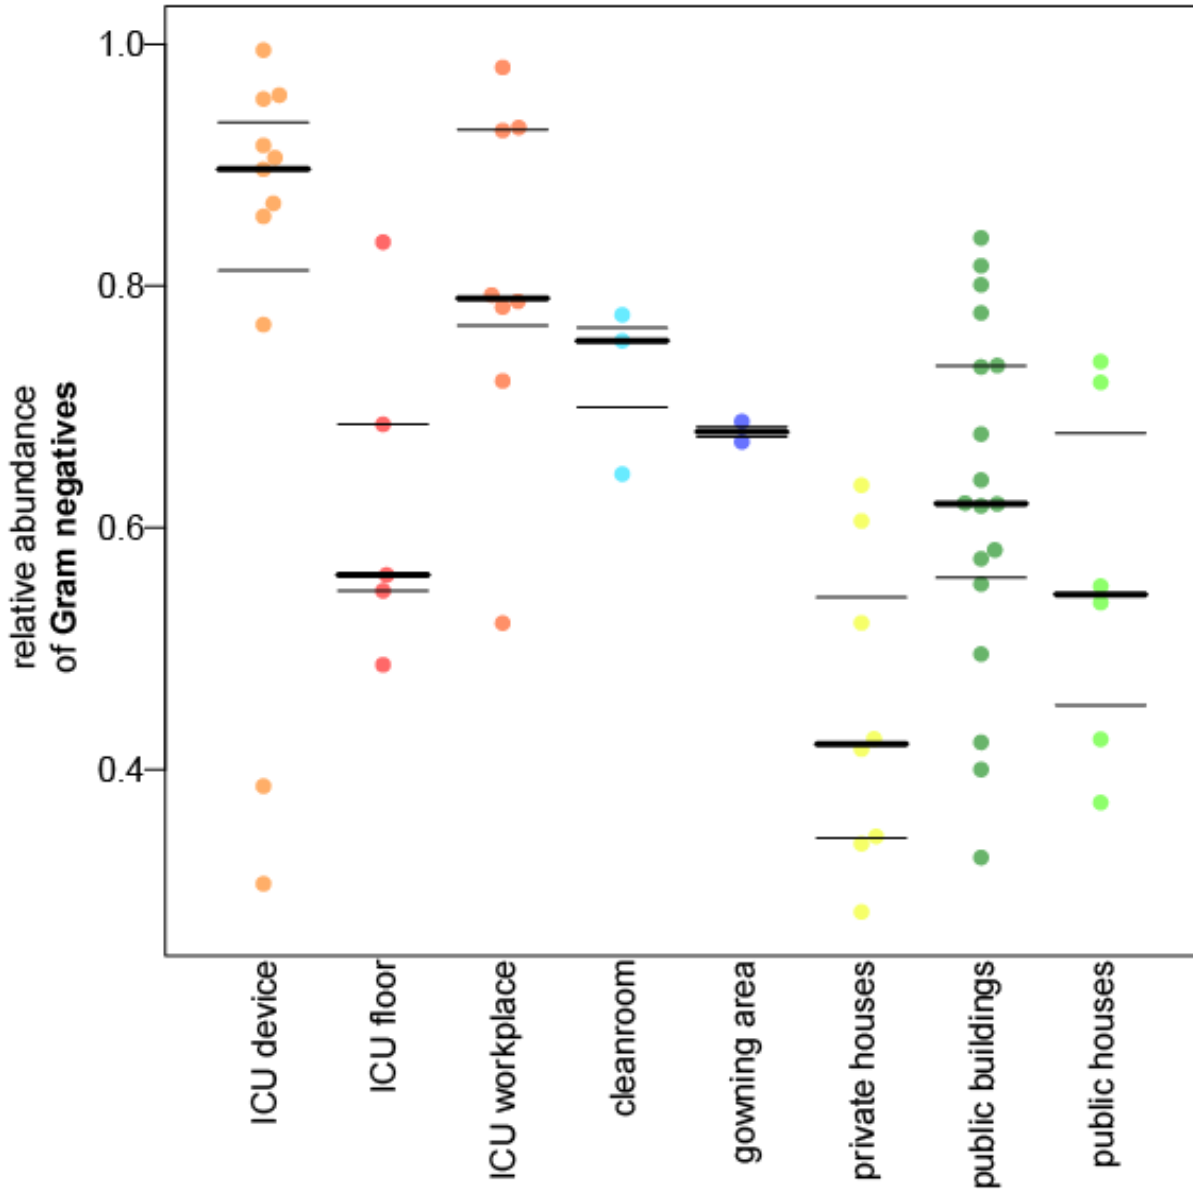

Supplementary Figure 9: **Gram negative bacteria**

Phenotype prediction of Gram negative bacteria based on 16S rRNA gene amplicon analysis.

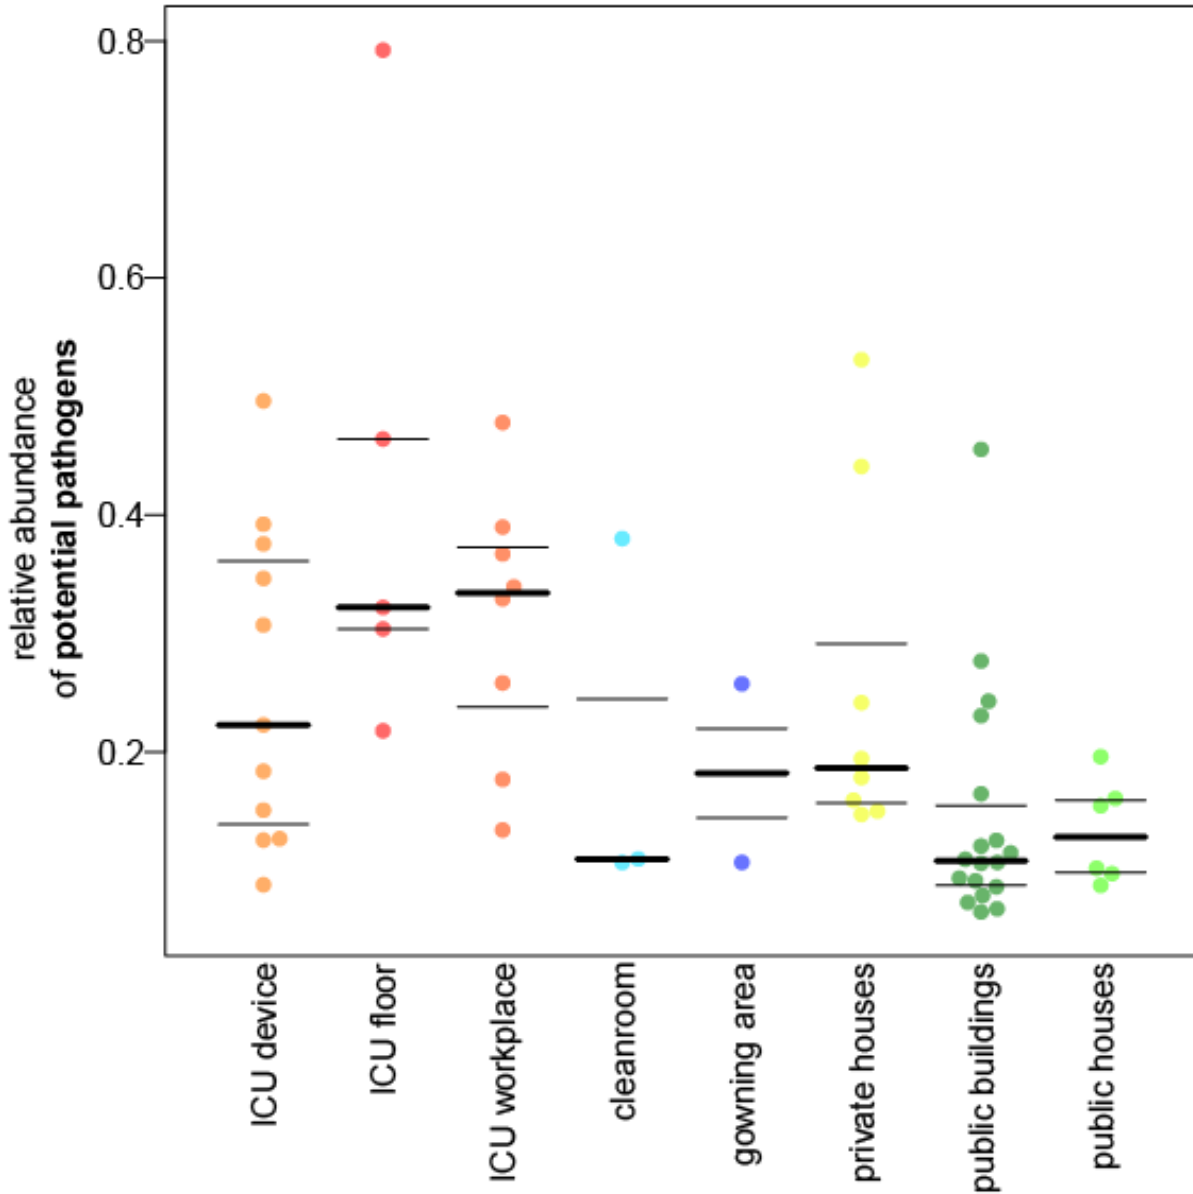

Supplementary Figure 10: **Potential pathogens**

Phenotype prediction of potential pathogens based on 16S rRNA gene amplicon analysis.

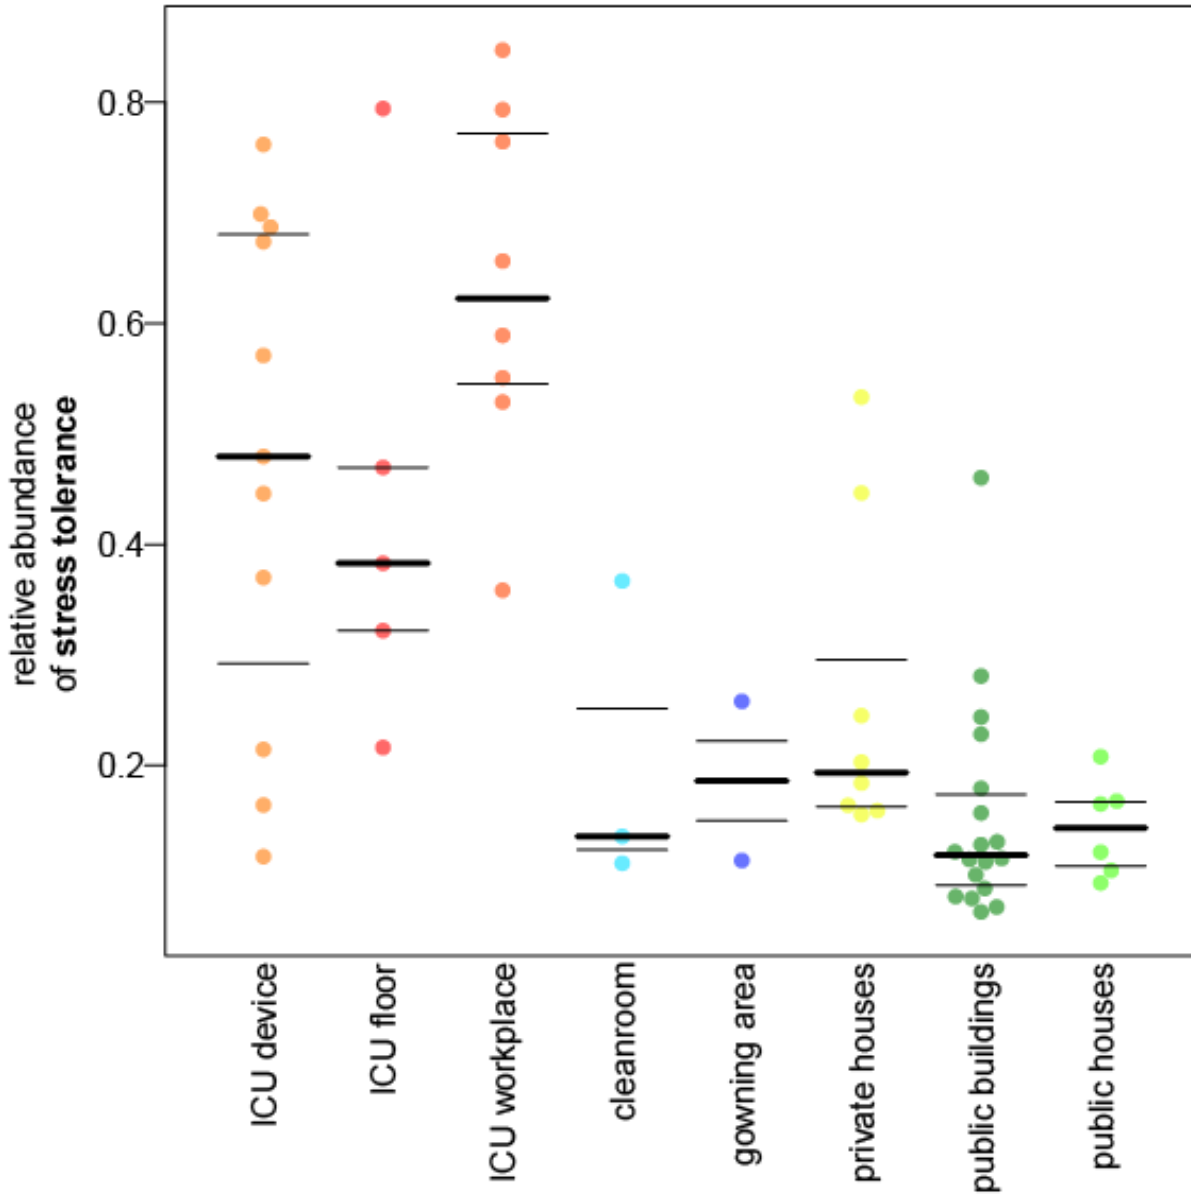

Supplementary Figure 11: **Potential stress tolerance**

Phenotype prediction of potential stress tolerant bacteria based on 16S rRNA gene amplicon analysis.

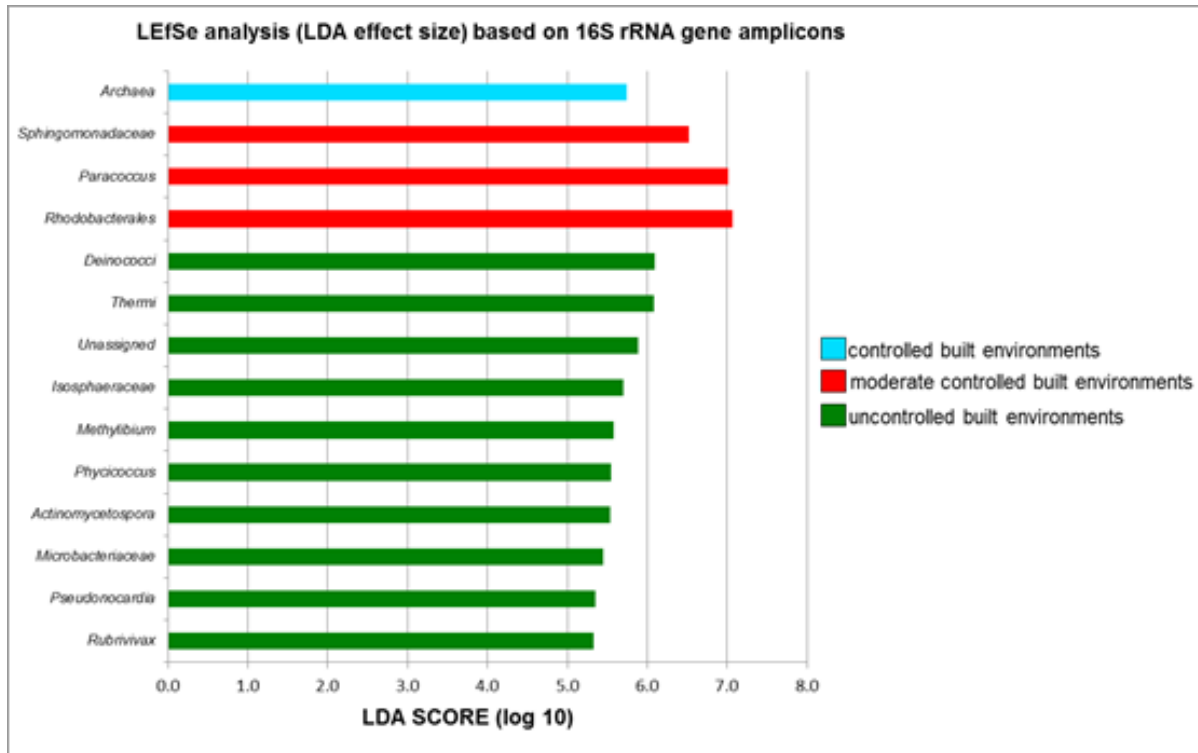

**Supplementary Figure 12: Distinctive taxa based on 16S rRNA gene amplicons**

LEfSe analysis (LDA effect size) on 16S rRNA gene amplicons of controlled (gowning area, cleanroom), moderate controlled (ICU) and uncontrolled (public buildings, public and private houses) built environments with the following parameters: per-sample normalization to 1M, factorial Kruskal-Wallis test among classes ( $\alpha = 0.05$ ), pairwise Wilcoxon test between subclasses ( $\alpha = 0.05$ ), threshold for the LDA score (2.0), strategy for multi-class analysis (all-against-all, more strict).

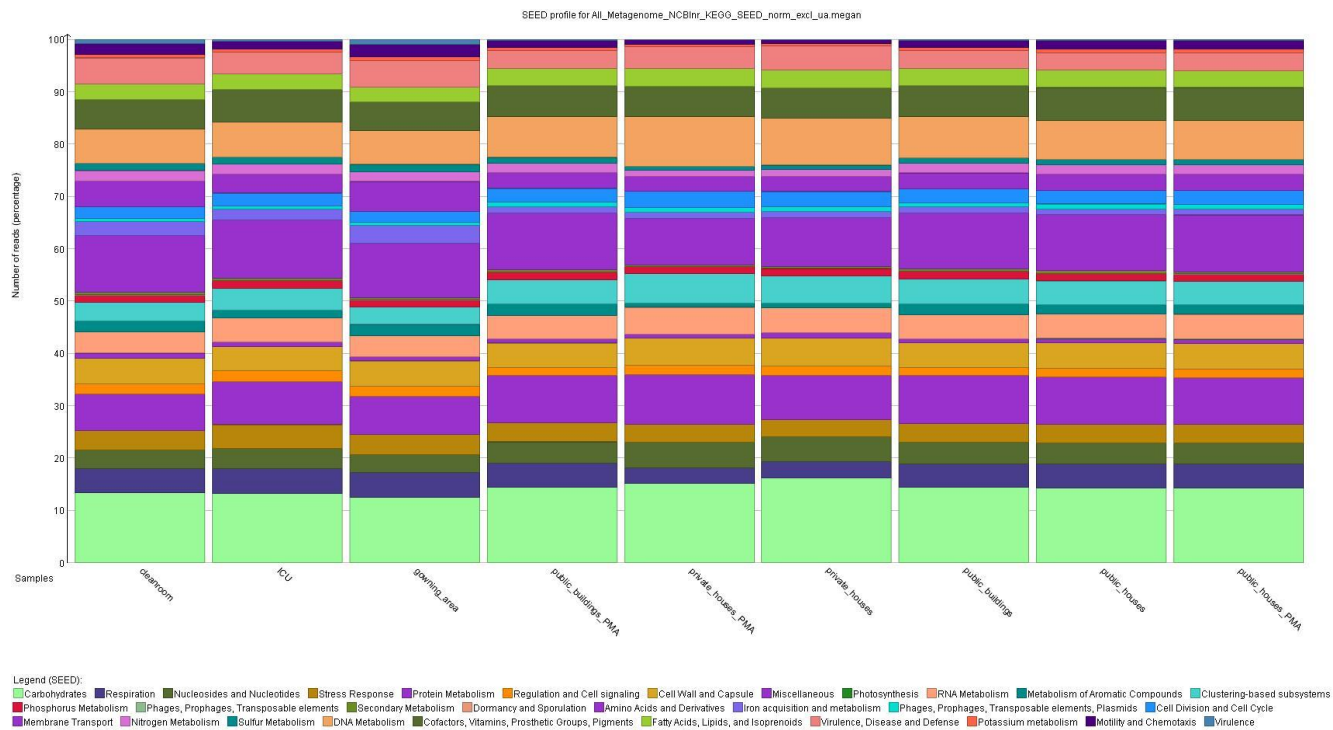

### Supplementary Figure 13: Functional profile (barchart)

Single reads BLASTx (rapsearch and diamond) vs. NCBI nr. SEED level 1 (derived from MEGAN, excluding unassigned reads, normalized data set).

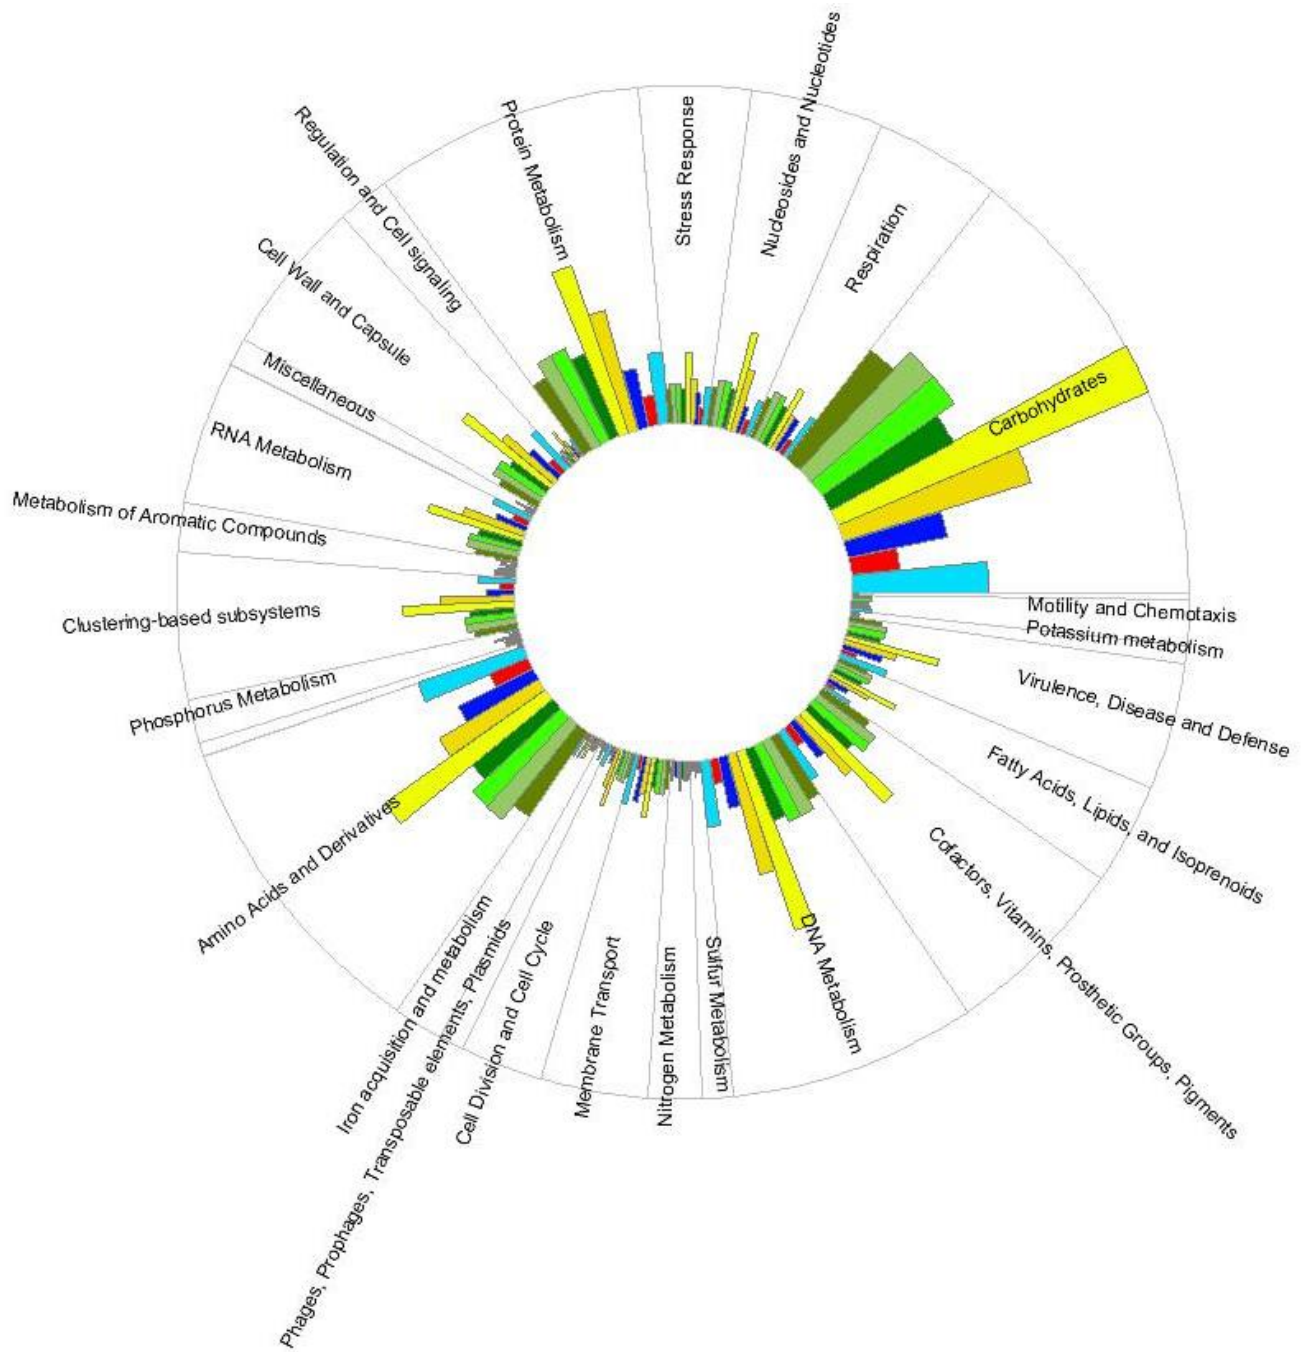

Legend (Samples):  
 cleanroom ICU gowning\_area private\_houses\_PMA private\_houses public\_buildings public\_houses public\_houses\_PMA public\_buildings\_PMA

**Supplementary Figure 14: Functional profile (radial chart)**

Space filling radial chart of SEED annotations on level 1 (species level, excluding unassigned reads, normalized, percentage) assigned (BLASTx NCBIInr, diamond and rapsearch) to different built environments (MEGAN).



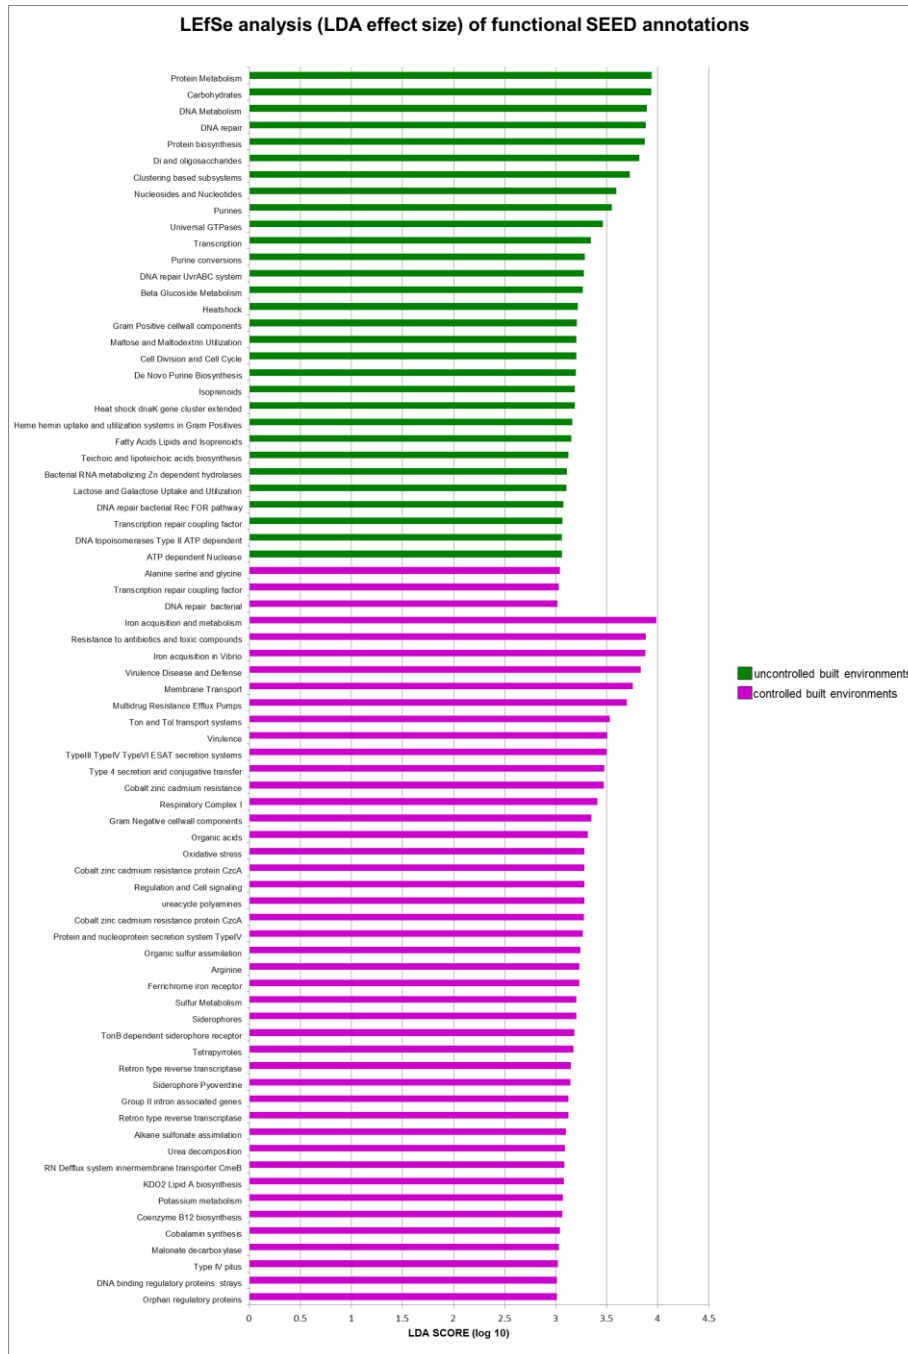

### Supplementary Figure 15: Distinctive functions

LEfSe analysis (LDA effect size) on functions (according to SEED database) of single reads from metagenomes of CB (ICU, gowning area, cleanroom) and UB (public buildings, public and private houses) built environments with the following parameters: per-sample normalization to 1M, factorial Kruskal-Wallis test among classes (alpha = 0.05), pairwise Wilcoxon test between subclasses (alpha = 0.05), threshold for the LDA score (3.0), strategy for multi-class analysis (all-against-all, more strict).

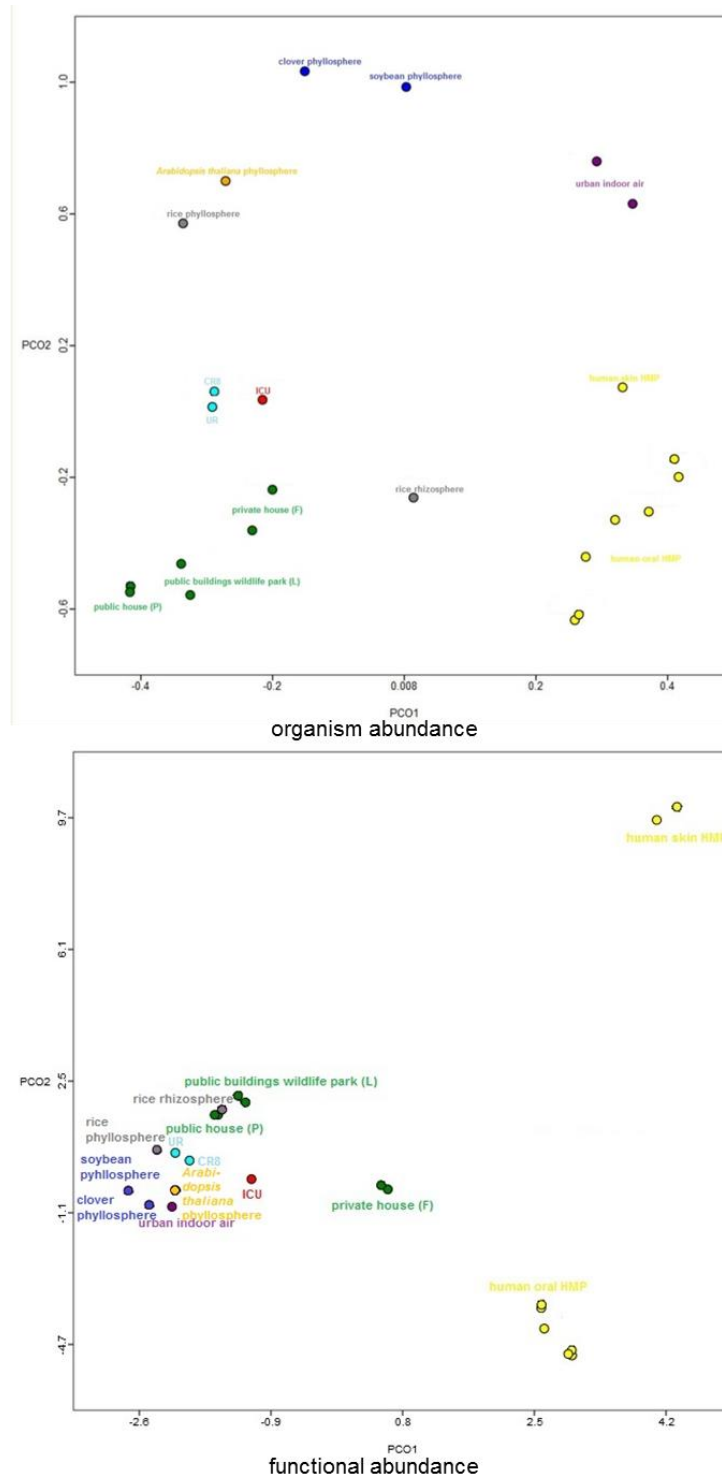

Supplementary Figure 16: **Meta-analysis of organisms and functions**

Comparative analysis of metagenome samples from CB and UB environments with publically available metagenome samples from plants, urban indoor air and the human microbiome project on organism and functional abundance levels visualized through MG-RAST.

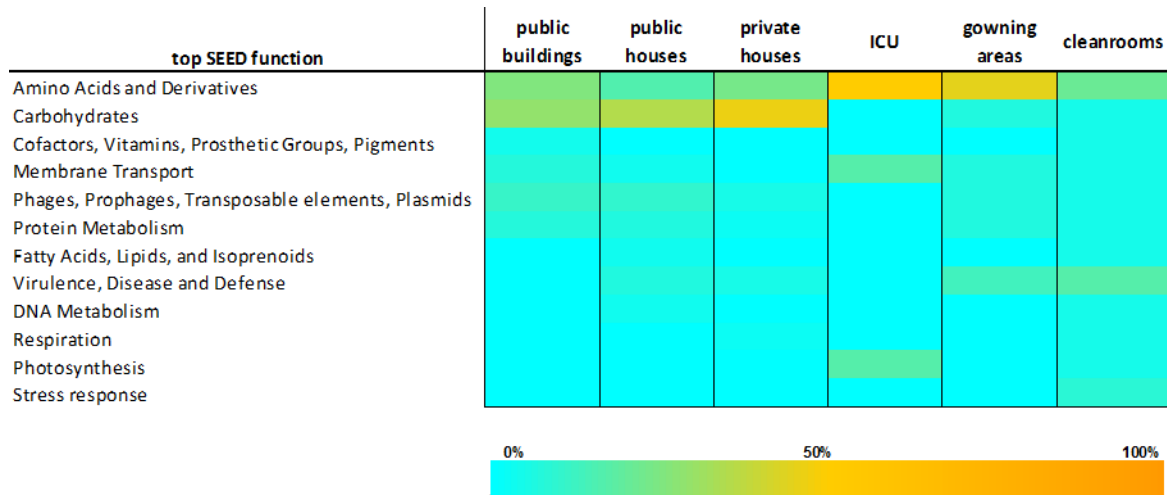

Supplementary Figure 17: **Main genome functions**

Relative proportions of annotated SEED functions with RAST for high quality bins from the metagenomics dataset of all sampled built environments.

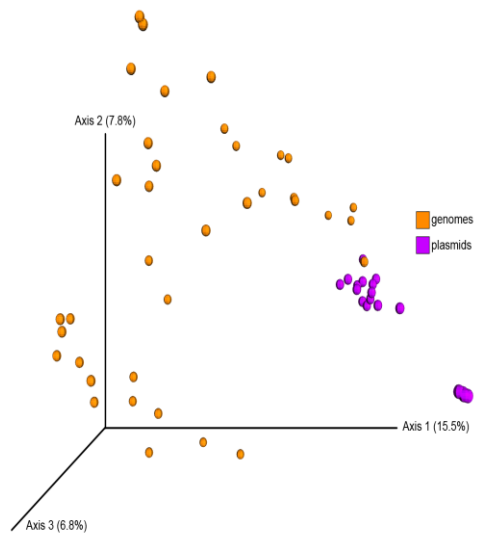

Supplementary Figure 18: **Resistome of genomes and plasmids**

Distances of binned genomes and plasmids according to detected resistance genes (CARD database).

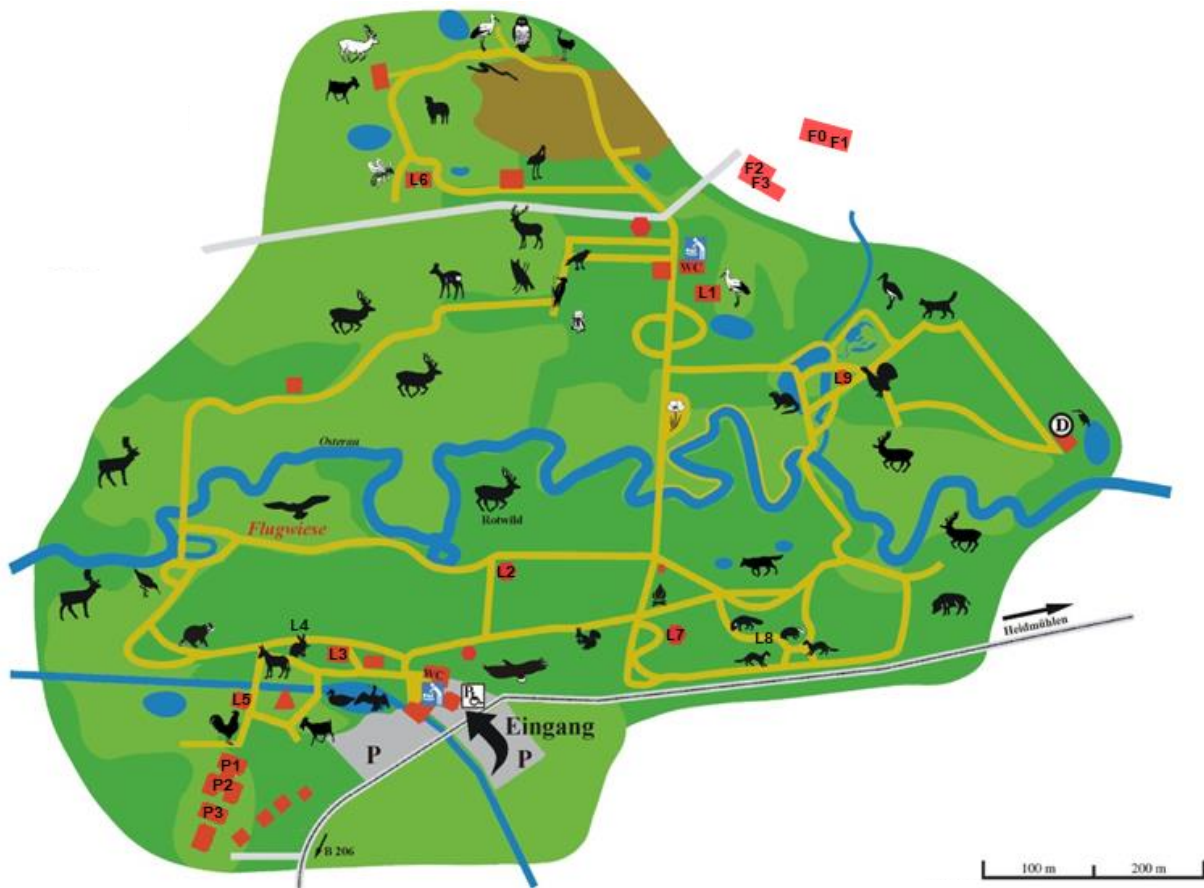

Supplementary Figure 19: **Unrestricted buildings (UB)**

Sampling map of public buildings (L) and public (P) and private houses (F) in a wildlife park in Grossenaspe, Germany (Figure was adapted from [https://www.wildpark-eekholt.de/besucherinformationen\\_lageplan.htm](https://www.wildpark-eekholt.de/besucherinformationen_lageplan.htm)).

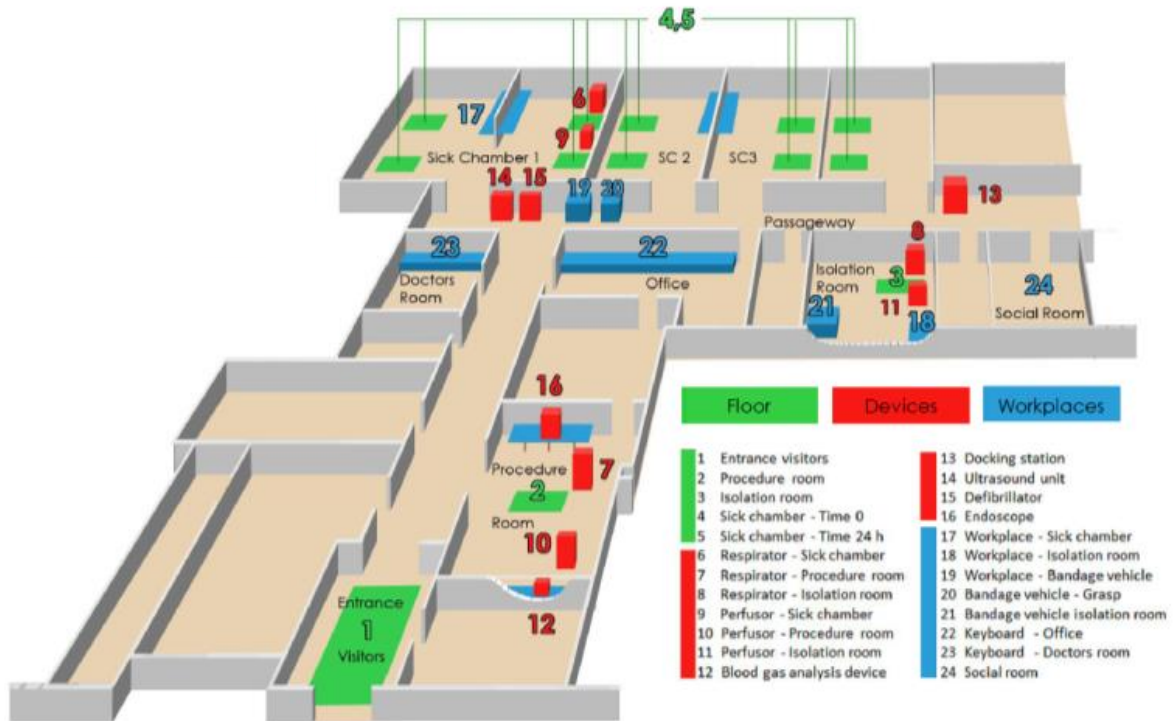

Supplementary Figure 20: **Controlled built environment (CB) - Intensive Care Unit**

Sampling map of the intensive care unit (ICU) at the state hospital in Graz, Austria (Figure was adapted from <sup>1</sup>).

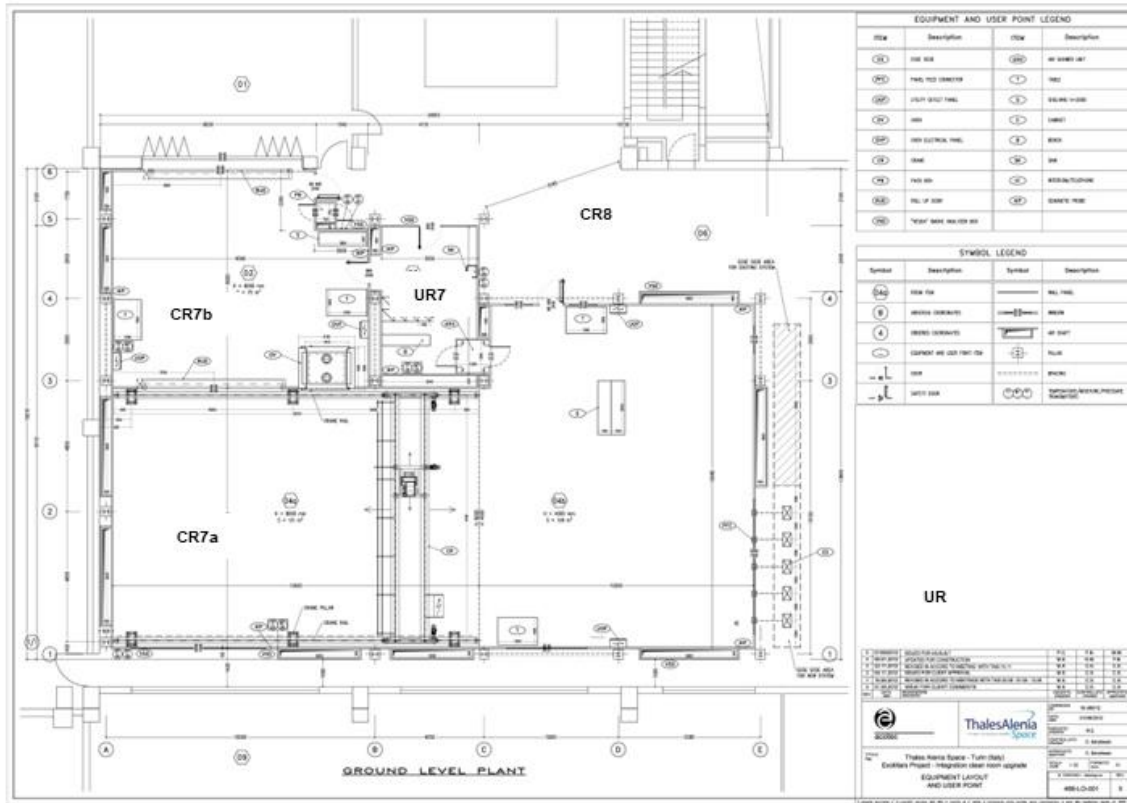

Supplementary Figure 21: **Controlled built environment (CB) - Cleanroom facility**  
 Sampling map of the Thales Alenia space cleanroom facility in Turin, Italy (Figure was adapted from <sup>2</sup>).

## Supplementary Tables

Supplementary Table 1: Alpha diversity estimates from single shotgun reads of the metagenomics dataset against the NCBI nr database using the blastX algorithm.

| samples              | Taxa    |         | Taxa (without <i>Hominoidae</i> ) |         | KEGG    |         | SEED    |         |
|----------------------|---------|---------|-----------------------------------|---------|---------|---------|---------|---------|
|                      | Shannon | Simpson | Shannon                           | Simpson | Shannon | Simpson | Shannon | Simpson |
| public_buildings     | 8.44    | 68.69   | 8.44                              | 68.67   | 11.41   | 1652.82 | 10.92   | 1279.98 |
| public_buildings_PMA | 8.42    | 61.75   | 8.42                              | 61.73   | 11.38   | 1616.20 | 11.01   | 1276.63 |
| public_houses        | 8.97    | 99.16   | 8.97                              | 99.08   | 11.58   | 1814.65 | 11.00   | 1255.54 |
| public_houses_PMA    | 9.00    | 101.20  | 9.00                              | 101.12  | 11.58   | 1811.69 | 11.01   | 1279.79 |
| private_houses       | 4.98    | 6.30    | 4.98                              | 6.30    | 11.35   | 1675.57 | 10.81   | 1191.86 |
| private_houses_PMA   | 5.10    | 6.78    | 5.10                              | 6.78    | 11.27   | 1591.29 | 10.97   | 1223.26 |
| gowning_area         | 7.76    | 35.81   | 8.06                              | 42.62   | 11.86   | 1947.20 | 11.02   | 884.36  |
| ICU                  | 6.27    | 12.32   | 7.28                              | 28.89   | 12.09   | 1017.25 | 11.12   | 1404.91 |
| cleanroom            | 7.54    | 21.66   | 8.42                              | 56.57   | 11.90   | 941.92  | 11.12   | 1114.67 |



# Supplementary Table 2: Summary on binned genomes from the shotgun metagenomics data set.

| Sample               | bin No.            | Marker lineage CheckM       | #genomes                 | # markers          | marker sets                   | 0                         | 1                  | 2                  | 3                             | 4                        | 5+                 | Completeness       | Contamination                 | Strain heterogeneity          | binID     | Count_Function | Function | MA31 Function                          | Count_OTU                    | Function_OTU                        | MA31 OTU                  | MA31 subsystem information     |                                     |                                     |                                     |                              |                                     |                                     |                                     |                                     |                                |                      |                                     |                                     |
|----------------------|--------------------|-----------------------------|--------------------------|--------------------|-------------------------------|---------------------------|--------------------|--------------------|-------------------------------|--------------------------|--------------------|--------------------|-------------------------------|-------------------------------|-----------|----------------|----------|----------------------------------------|------------------------------|-------------------------------------|---------------------------|--------------------------------|-------------------------------------|-------------------------------------|-------------------------------------|------------------------------|-------------------------------------|-------------------------------------|-------------------------------------|-------------------------------------|--------------------------------|----------------------|-------------------------------------|-------------------------------------|
| ISO 8 cleanroom (CR) | 10                 | W_Bacteria (UD020)          | 549                      | 102                | 57                            | 94                        | 8                  | 0                  | 0                             | 0                        | 7.5                | 0                  | 0                             | 0                             | CR_bin130 | 185            | 0.00917  | Mobile element protein                 | 140                          | 0.17388                             | Pseudomonas               | virulence, disease and defense |                                     |                                     |                                     |                              |                                     |                                     |                                     |                                     |                                |                      |                                     |                                     |
|                      | 11                 | W_Bacteria (UD020)          | 549                      | 104                | 58                            | 72                        | 2                  | 1                  | 0                             | 0                        | 11.2               | 1.75               | 1.00                          | 0                             | CR_bin131 | 154            | 0.00578  | Transcriptional regulator, LysR family | 35                           | 0.02628                             | Stenotrophomonas          | virulence, disease and defense |                                     |                                     |                                     |                              |                                     |                                     |                                     |                                     |                                |                      |                                     |                                     |
|                      | 16                 | W_Bacteria (UD015)          | 549                      | 107                | 61                            | 147                       | 21                 | 1                  | 0                             | 0                        | 4.17               | 0.31               | 20                            | 0                             | CR_bin136 | 5              | 0.04955  | LSU ribosomal protein L2p (L6)         | 1                            | 0.0625                              | Cyanobacter sp. ATCC 8001 | photosynthesis                 |                                     |                                     |                                     |                              |                                     |                                     |                                     |                                     |                                |                      |                                     |                                     |
|                      | private houses (F) | 1                           | W_Bacteria (UD020)       | 549                | 104                           | 58                        | 15                 | 24                 | 46                            | 15                       | 3                  | 17.65              | 14.5                          | 21.85                         | 0         | F_bin15        | 18       | 0.00377                                | Oligopeptide ABC transporter | 149                                 | 0.60219                   | Leuconostoc                    | Carbohydrates (442)                 |                                     |                                     |                              |                                     |                                     |                                     |                                     |                                |                      |                                     |                                     |
|                      |                    | 15                          | W_Micrococcaceae (UD162) | 549                | 104                           | 58                        | 45                 | 218                | 288                           | 345                      | 21                 | 0                  | 0.74                          | 5.5                           | 15.38     | F_bin19        | 29       | 0.01309                                | Mobile element protein       | 149                                 | 0.30781                   | Moraxella lutea                | Carbohydrates (128)                 |                                     |                                     |                              |                                     |                                     |                                     |                                     |                                |                      |                                     |                                     |
|                      |                    | 17                          | W_Bacteria (UD020)       | 549                | 104                           | 58                        | 56                 | 39                 | 34                            | 4                        | 0                  | 21.1               | 7.68                          | 61.54                         | 0         | F_bin17        | 18       | 0.01184                                | Mobile element protein       | 81                                  | 0.58621                   | Enterobacter                   | Respiration (2)                     |                                     |                                     |                              |                                     |                                     |                                     |                                     |                                |                      |                                     |                                     |
|                      |                    | private houses (PMA F_plus) | 1                        | W_Bacteria (UD020) | 549                           | 104                       | 58                 | 13                 | 24                            | 22                       | 17                 | 15                 | 13.98                         | 22.5                          | 30.54     | 0              | F_bin20  | 28                                     | 0.00278                      | Mobile element protein, putative    | 1180                      | 0.34136                        | Micrococcus                         | Carbohydrates (128)                 |                                     |                              |                                     |                                     |                                     |                                     |                                |                      |                                     |                                     |
|                      |                    |                             | 23                       | W_Bacteria (UD020) | 549                           | 104                       | 58                 | 97                 | 6                             | 0                        | 0                  | 0                  | 6.62                          | 0                             | 0         | 0              | F_bin25  | 2                                      | 0.00667                      | Proposed peptidoglycan lipi III     | 118                       | 0.02944                        | Enhyobacter                         | Carbohydrates (128)                 |                                     |                              |                                     |                                     |                                     |                                     |                                |                      |                                     |                                     |
|                      |                    |                             | 31                       | W_Bacteria (UD020) | 549                           | 104                       | 58                 | 96                 | 8                             | 0                        | 0                  | 0                  | 1.96                          | 0                             | 0         | 0              | F_bin29  | 2                                      | 0.00256                      | Lipid A export ATP-binding/permease | 336                       | 0.54105                        | Lactococcus garvieae                | Carbohydrates (128)                 |                                     |                              |                                     |                                     |                                     |                                     |                                |                      |                                     |                                     |
|                      |                    |                             | root (UD1)               | 1                  | W_Bacteria (UD020)            | 549                       | 104                | 58                 | 102                           | 0                        | 0                  | 0                  | 0                             | 2.59                          | 0         | 0              | 0        | F_bin1                                 | 16                           | 0.04507                             | Mobile element protein    | 28                             | 0.26221                             | Koaria rhizophila                   | Virulence, Disease and Defense (18) |                              |                                     |                                     |                                     |                                     |                                |                      |                                     |                                     |
|                      |                    |                             |                          | 10                 | W_Enterobacteriaceae (UD0505) | 549                       | 104                | 58                 | 313                           | 516                      | 48                 | 0                  | 0                             | 0.039                         | 5.27      | 91.3           | 0        | F_bin10                                | 10                           | 0.02075                             | glycyltransferase         | 305                            | 0.55504                             | Parvona ananatis LMG                | Amino Acids and Derivatives (140)   |                              |                                     |                                     |                                     |                                     |                                |                      |                                     |                                     |
|                      |                    |                             |                          | 23                 | W_Bacteria (UD020)            | 549                       | 104                | 58                 | 208                           | 189                      | 17                 | 1                  | 0                             | 0                             | 4.01      | 4.5            | 0        | F_bin13                                | 18                           | 0.01159                             | Mobile element protein    | 862                            | 0.81015                             | Enterococcus                        | Carbohydrates (120)                 |                              |                                     |                                     |                                     |                                     |                                |                      |                                     |                                     |
|                      |                    |                             |                          | gowning area (UR)  | 1                             | W_Bacteria (UD020)        | 549                | 104                | 58                            | 15                       | 24                 | 46                 | 15                            | 3                             | 17.65     | 14.5           | 21.85    | 0                                      | F_bin15                      | 18                                  | 0.00377                   | Oligopeptide ABC transporter   | 149                                 | 0.60219                             | Leuconostoc                         | Carbohydrates (442)          |                                     |                                     |                                     |                                     |                                |                      |                                     |                                     |
|                      |                    |                             |                          |                    | 15                            | W_Micrococcaceae (UD162)  | 549                | 104                | 58                            | 45                       | 218                | 288                | 345                           | 21                            | 0         | 0.74           | 5.5      | 15.38                                  | F_bin19                      | 29                                  | 0.01309                   | Mobile element protein         | 149                                 | 0.30781                             | Moraxella lutea                     | Carbohydrates (128)          |                                     |                                     |                                     |                                     |                                |                      |                                     |                                     |
|                      |                    |                             |                          |                    | 17                            | W_Bacteria (UD020)        | 549                | 104                | 58                            | 56                       | 39                 | 34                 | 4                             | 0                             | 21.1      | 7.68           | 61.54    | 0                                      | F_bin17                      | 18                                  | 0.01184                   | Mobile element protein         | 81                                  | 0.58621                             | Enterobacter                        | Respiration (2)              |                                     |                                     |                                     |                                     |                                |                      |                                     |                                     |
|                      |                    |                             |                          |                    | public buildings (clean)      | 1                         | W_Bacteria (UD020) | 549                | 104                           | 58                       | 43                 | 30                 | 20                            | 7                             | 4         | 84.28          | 68.1     | 56.92                                  | 0                            | F_bin2                              | 89                        | 0.01283                        | Mobile element protein              | 139                                 | 0.69191                             | Carbohydrates (128)          | virulence, disease and defense      |                                     |                                     |                                     |                                |                      |                                     |                                     |
|                      |                    |                             |                          |                    |                               | 20                        | W_Bacteria (UD020) | 549                | 104                           | 58                       | 85                 | 19                 | 0                             | 0                             | 0         | 0              | 0        | 0                                      | 0                            | F_bin21                             | 81                        | 0.00566                        | Lipid A export ATP-binding/permease | 336                                 | 0.82781                             | Lactococcus garvieae         | Carbohydrates (128)                 |                                     |                                     |                                     |                                |                      |                                     |                                     |
|                      |                    |                             |                          |                    |                               | 23                        | W_Bacteria (UD020) | 549                | 104                           | 58                       | 13                 | 24                 | 22                            | 17                            | 15        | 13.98          | 22.5     | 30.54                                  | 0                            | F_bin23                             | 28                        | 0.00278                        | Mobile element protein, putative    | 1180                                | 0.34136                             | Micrococcus                  | Carbohydrates (128)                 |                                     |                                     |                                     |                                |                      |                                     |                                     |
|                      |                    |                             |                          |                    |                               | public buildings (P_plus) | 1                  | W_Bacteria (UD020) | 549                           | 104                      | 58                 | 97                 | 6                             | 0                             | 0         | 0              | 6.62     | 0                                      | 0                            | 0                                   | F_bin25                   | 2                              | 0.00667                             | Proposed peptidoglycan lipi III     | 118                                 | 0.02944                      | Enhyobacter                         | Carbohydrates (128)                 |                                     |                                     |                                |                      |                                     |                                     |
|                      |                    |                             |                          |                    |                               |                           | 15                 | W_Bacteria (UD020) | 549                           | 104                      | 58                 | 96                 | 8                             | 0                             | 0         | 0              | 1.96     | 0                                      | 0                            | 0                                   | F_bin29                   | 2                              | 0.00256                             | Lipid A export ATP-binding/permease | 336                                 | 0.54105                      | Lactococcus garvieae                | Carbohydrates (128)                 |                                     |                                     |                                |                      |                                     |                                     |
|                      |                    |                             |                          |                    |                               |                           | 17                 | W_Bacteria (UD020) | 549                           | 104                      | 58                 | 96                 | 8                             | 0                             | 0         | 0              | 1.96     | 0                                      | 0                            | 0                                   | F_bin29                   | 2                              | 0.00256                             | Lipid A export ATP-binding/permease | 336                                 | 0.54105                      | Lactococcus garvieae                | Carbohydrates (128)                 |                                     |                                     |                                |                      |                                     |                                     |
|                      |                    |                             |                          |                    |                               |                           | gowning area (UR)  | 1                  | W_Bacteria (UD020)            | 549                      | 104                | 58                 | 102                           | 0                             | 0         | 0              | 0        | 2.59                                   | 0                            | 0                                   | 0                         | F_bin1                         | 16                                  | 0.04507                             | Mobile element protein              | 28                           | 0.26221                             | Koaria rhizophila                   | Virulence, Disease and Defense (18) |                                     |                                |                      |                                     |                                     |
|                      |                    |                             |                          |                    |                               |                           |                    | 10                 | W_Enterobacteriaceae (UD0505) | 549                      | 104                | 58                 | 313                           | 516                           | 48        | 0              | 0        | 0.039                                  | 5.27                         | 91.3                                | 0                         | F_bin10                        | 10                                  | 0.02075                             | glycyltransferase                   | 305                          | 0.55504                             | Parvona ananatis LMG                | Amino Acids and Derivatives (140)   |                                     |                                |                      |                                     |                                     |
|                      |                    |                             |                          |                    |                               |                           |                    | 23                 | W_Bacteria (UD020)            | 549                      | 104                | 58                 | 208                           | 189                           | 17        | 1              | 0        | 0                                      | 4.01                         | 4.5                                 | 0                         | F_bin13                        | 18                                  | 0.01159                             | Mobile element protein              | 862                          | 0.81015                             | Enterococcus                        | Carbohydrates (120)                 |                                     |                                |                      |                                     |                                     |
|                      |                    |                             |                          |                    |                               |                           |                    | gowning area (UR)  | 1                             | W_Bacteria (UD020)       | 549                | 104                | 58                            | 15                            | 24        | 46             | 15       | 3                                      | 17.65                        | 14.5                                | 21.85                     | 0                              | F_bin15                             | 18                                  | 0.00377                             | Oligopeptide ABC transporter | 149                                 | 0.60219                             | Leuconostoc                         | Carbohydrates (442)                 |                                |                      |                                     |                                     |
|                      |                    |                             |                          |                    |                               |                           |                    |                    | 15                            | W_Micrococcaceae (UD162) | 549                | 104                | 58                            | 45                            | 218       | 288            | 345      | 21                                     | 0                            | 0.74                                | 5.5                       | 15.38                          | F_bin19                             | 29                                  | 0.01309                             | Mobile element protein       | 149                                 | 0.30781                             | Moraxella lutea                     | Carbohydrates (128)                 |                                |                      |                                     |                                     |
|                      |                    |                             |                          |                    |                               |                           |                    |                    | 17                            | W_Bacteria (UD020)       | 549                | 104                | 58                            | 56                            | 39        | 34             | 4        | 0                                      | 21.1                         | 7.68                                | 61.54                     | 0                              | F_bin17                             | 18                                  | 0.01184                             | Mobile element protein       | 81                                  | 0.58621                             | Enterobacter                        | Respiration (2)                     |                                |                      |                                     |                                     |
|                      |                    |                             |                          |                    |                               |                           |                    |                    | gowning area (UR)             | 1                        | W_Bacteria (UD020) | 549                | 104                           | 58                            | 43        | 30             | 20       | 7                                      | 4                            | 84.28                               | 68.1                      | 56.92                          | 0                                   | F_bin2                              | 89                                  | 0.01283                      | Mobile element protein              | 139                                 | 0.69191                             | Carbohydrates (128)                 | virulence, disease and defense |                      |                                     |                                     |
|                      |                    |                             |                          |                    |                               |                           |                    |                    |                               | 20                       | W_Bacteria (UD020) | 549                | 104                           | 58                            | 85        | 19             | 0        | 0                                      | 0                            | 0                                   | 0                         | 0                              | 0                                   | F_bin21                             | 81                                  | 0.00566                      | Lipid A export ATP-binding/permease | 336                                 | 0.82781                             | Lactococcus garvieae                | Carbohydrates (128)            |                      |                                     |                                     |
|                      |                    |                             |                          |                    |                               |                           |                    |                    |                               | 23                       | W_Bacteria (UD020) | 549                | 104                           | 58                            | 13        | 24             | 22       | 17                                     | 15                           | 13.98                               | 22.5                      | 30.54                          | 0                                   | F_bin23                             | 28                                  | 0.00278                      | Mobile element protein, putative    | 1180                                | 0.34136                             | Micrococcus                         | Carbohydrates (128)            |                      |                                     |                                     |
|                      |                    |                             |                          |                    |                               |                           |                    |                    |                               | gowning area (UR)        | 1                  | W_Bacteria (UD020) | 549                           | 104                           | 58        | 97             | 6        | 0                                      | 0                            | 0                                   | 6.62                      | 0                              | 0                                   | 0                                   | F_bin25                             | 2                            | 0.00667                             | Proposed peptidoglycan lipi III     | 118                                 | 0.02944                             | Enhyobacter                    | Carbohydrates (128)  |                                     |                                     |
|                      |                    |                             |                          |                    |                               |                           |                    |                    |                               |                          | 15                 | W_Bacteria (UD020) | 549                           | 104                           | 58        | 96             | 8        | 0                                      | 0                            | 0                                   | 1.96                      | 0                              | 0                                   | 0                                   | F_bin29                             | 2                            | 0.00256                             | Lipid A export ATP-binding/permease | 336                                 | 0.54105                             | Lactococcus garvieae           | Carbohydrates (128)  |                                     |                                     |
|                      |                    |                             |                          |                    |                               |                           |                    |                    |                               |                          | 17                 | W_Bacteria (UD020) | 549                           | 104                           | 58        | 96             | 8        | 0                                      | 0                            | 0                                   | 1.96                      | 0                              | 0                                   | 0                                   | F_bin29                             | 2                            | 0.00256                             | Lipid A export ATP-binding/permease | 336                                 | 0.54105                             | Lactococcus garvieae           | Carbohydrates (128)  |                                     |                                     |
|                      |                    |                             |                          |                    |                               |                           |                    |                    |                               |                          | gowning area (UR)  | 1                  | W_Bacteria (UD020)            | 549                           | 104       | 58             | 102      | 0                                      | 0                            | 0                                   | 0                         | 2.59                           | 0                                   | 0                                   | 0                                   | F_bin1                       | 16                                  | 0.04507                             | Mobile element protein              | 28                                  | 0.26221                        | Koaria rhizophila    | Virulence, Disease and Defense (18) |                                     |
|                      |                    |                             |                          |                    |                               |                           |                    |                    |                               |                          |                    | 10                 | W_Enterobacteriaceae (UD0505) | 549                           | 104       | 58             | 313      | 516                                    | 48                           | 0                                   | 0                         | 0.039                          | 5.27                                | 91.3                                | 0                                   | F_bin10                      | 10                                  | 0.02075                             | glycyltransferase                   | 305                                 | 0.55504                        | Parvona ananatis LMG | Amino Acids and Derivatives (140)   |                                     |
|                      |                    |                             |                          |                    |                               |                           |                    |                    |                               |                          |                    | 23                 | W_Bacteria (UD020)            | 549                           | 104       | 58             | 208      | 189                                    | 17                           | 1                                   | 0                         | 0                              | 4.01                                | 4.5                                 | 0                                   | F_bin13                      | 18                                  | 0.01159                             | Mobile element protein              | 862                                 | 0.81015                        | Enterococcus         | Carbohydrates (120)                 |                                     |
|                      |                    |                             |                          |                    |                               |                           |                    |                    |                               |                          |                    | gowning area (UR)  | 1                             | W_Bacteria (UD020)            | 549       | 104            | 58       | 15                                     | 24                           | 46                                  | 15                        | 3                              | 17.65                               | 14.5                                | 21.85                               | 0                            | F_bin15                             | 18                                  | 0.00377                             | Oligopeptide ABC transporter        | 149                            | 0.60219              | Leuconostoc                         | Carbohydrates (442)                 |
|                      |                    |                             |                          |                    |                               |                           |                    |                    |                               |                          |                    |                    | 15                            | W_Micrococcaceae (UD162)      | 549       | 104            | 58       | 45                                     | 218                          | 288                                 | 345                       | 21                             | 0                                   | 0.74                                | 5.5                                 | 15.38                        | F_bin19                             | 29                                  | 0.01309                             | Mobile element protein              | 149                            | 0.30781              | Moraxella lutea                     | Carbohydrates (128)                 |
| 17                   |                    |                             |                          |                    |                               |                           |                    |                    |                               |                          |                    |                    | W_Bacteria (UD020)            | 549                           | 104       | 58             | 56       | 39                                     | 34                           | 4                                   | 0                         | 21.1                           | 7.68                                | 61.54                               | 0                                   | F_bin17                      | 18                                  | 0.01184                             | Mobile element protein              | 81                                  | 0.58621                        | Enterobacter         | Respiration (2)                     |                                     |
| gowning area (UR)    |                    |                             |                          |                    |                               |                           |                    |                    |                               |                          |                    |                    | 1                             | W_Bacteria (UD020)            | 549       | 104            | 58       | 43                                     | 30                           | 20                                  | 7                         | 4                              | 84.28                               | 68.1                                | 56.92                               | 0                            | F_bin2                              | 89                                  | 0.01283                             | Mobile element protein              | 139                            | 0.69191              | Carbohydrates (128)                 | virulence, disease and defense      |
|                      |                    |                             |                          |                    |                               |                           |                    |                    |                               |                          |                    |                    | 20                            | W_Bacteria (UD020)            | 549       | 104            | 58       | 85                                     | 19                           | 0                                   | 0                         | 0                              | 0                                   | 0                                   | 0                                   | 0                            | F_bin21                             | 81                                  | 0.00566                             | Lipid A export ATP-binding/permease | 336                            | 0.82781              | Lactococcus garvieae                | Carbohydrates (128)                 |
|                      | 23                 |                             |                          |                    |                               |                           |                    |                    |                               |                          |                    |                    | W_Bacteria (UD020)            | 549                           | 104       | 58             | 13       | 24                                     | 22                           | 17                                  | 15                        | 13.98                          | 22.5                                | 30.54                               | 0                                   | F_bin23                      | 28                                  | 0.00278                             | Mobile element protein, putative    | 1180                                | 0.34136                        | Micrococcus          | Carbohydrates (128)                 |                                     |
|                      | gowning area (UR)  |                             |                          |                    |                               |                           |                    |                    |                               |                          |                    |                    | 1                             | W_Bacteria (UD020)            | 549       | 104            | 58       | 97                                     | 6                            | 0                                   | 0                         | 0                              | 6.62                                | 0                                   | 0                                   | 0                            | F_bin25                             | 2                                   | 0.00667                             | Proposed peptidoglycan lipi III     | 118                            | 0.02944              | Enhyobacter                         | Carbohydrates (128)                 |
|                      |                    |                             |                          |                    |                               |                           |                    |                    |                               |                          |                    |                    | 15                            | W_Bacteria (UD020)            | 549       | 104            | 58       | 96                                     | 8                            | 0                                   | 0                         | 0                              | 1.96                                | 0                                   | 0                                   | 0                            | F_bin29                             | 2                                   | 0.00256                             | Lipid A export ATP-binding/permease | 336                            | 0.54105              | Lactococcus garvieae                | Carbohydrates (128)                 |
|                      |                    | 17                          |                          |                    |                               |                           |                    |                    |                               |                          |                    |                    | W_Bacteria (UD020)            | 549                           | 104       | 58             | 96       | 8                                      | 0                            | 0                                   | 0                         | 1.96                           | 0                                   | 0                                   | 0                                   | F_bin29                      | 2                                   | 0.00256                             | Lipid A export ATP-binding/permease | 336                                 | 0.54105                        | Lactococcus garvieae | Carbohydrates (128)                 |                                     |
|                      |                    | gowning area (UR)           |                          |                    |                               |                           |                    |                    |                               |                          |                    |                    | 1                             | W_Bacteria (UD020)            | 549       | 104            | 58       | 102                                    | 0                            | 0                                   | 0                         | 0                              | 2.59                                | 0                                   | 0                                   | 0                            | F_bin1                              | 16                                  | 0.04507                             | Mobile element protein              | 28                             | 0.26221              | Koaria rhizophila                   | Virulence, Disease and Defense (18) |
|                      |                    |                             |                          |                    |                               |                           |                    |                    |                               |                          |                    |                    | 10                            | W_Enterobacteriaceae (UD0505) | 549       | 104            | 58       | 313                                    | 516                          | 48                                  | 0                         | 0                              | 0.039                               | 5.27                                | 91.3                                | 0                            | F_bin10                             | 10                                  | 0.02075                             | glycyltransferase                   | 305                            | 0.55504              | Parvona ananatis LMG                | Amino Acids and Derivatives (140)   |
|                      |                    |                             | 23                       |                    |                               |                           |                    |                    |                               |                          |                    |                    | W_Bacteria (UD020)            | 549                           | 104       | 58             | 208      | 189                                    | 17                           | 1                                   | 0                         | 0                              | 4.01                                | 4.5                                 | 0                                   | F_bin13                      | 18                                  | 0.01159                             | Mobile element protein              | 862                                 | 0.81015                        | Enterococcus         | Carbohydrates (120)                 |                                     |
|                      |                    |                             | gowning area (UR)        |                    |                               |                           |                    |                    |                               |                          |                    |                    | 1                             | W_Bacteria (UD020)            | 549       | 104            | 58       | 15                                     | 24                           | 46                                  | 15                        | 3                              | 17.65                               | 14.5                                | 21.85                               | 0                            | F_bin15                             | 18                                  | 0.00377                             | Oligopeptide ABC transporter        | 149                            | 0.60219              | Leuconostoc                         | Carbohydrates (442)                 |
|                      |                    |                             |                          |                    |                               |                           |                    |                    |                               |                          |                    |                    | 15                            | W_Micrococcaceae (UD162)      | 549       | 104            | 58       | 45                                     | 218                          | 288                                 | 345                       | 21                             | 0                                   | 0.74                                | 5.5                                 | 15.38                        | F_bin19                             | 29                                  | 0.01309                             | Mobile element protein              | 149                            | 0.30781              | Moraxella lutea                     | Carbohydrates (128)                 |
|                      |                    |                             |                          | 17                 |                               |                           |                    |                    |                               |                          |                    |                    | W_Bacteria (UD020)            | 549                           | 104       | 58             | 56       | 39                                     | 34                           | 4                                   | 0                         | 21.1                           | 7.68                                | 61.54                               | 0                                   | F_bin17                      | 18                                  | 0.01184                             | Mobile element protein              | 81                                  | 0.58621                        | Enterobacter         | Respiration (2)                     |                                     |
|                      |                    |                             |                          | gowning area (UR)  |                               |                           |                    |                    |                               |                          |                    |                    | 1                             | W_Bacteria (UD020)            | 549       | 104            | 58       | 43                                     | 30                           | 20                                  | 7                         | 4                              | 84.28                               | 68.1                                | 56.92                               | 0                            | F_bin2                              | 89                                  | 0.01283                             | Mobile element protein              | 139                            | 0.69191              | Carbohydrates (128)                 | virulence, disease and defense      |
|                      |                    |                             |                          |                    |                               |                           |                    |                    |                               |                          |                    |                    | 20                            | W_Bacteria (UD020)            | 549       | 104            | 58       | 85                                     | 19                           | 0                                   | 0                         | 0                              | 0                                   | 0                                   | 0                                   | 0                            | F_bin21                             | 81                                  | 0.00566                             | Lipid A export ATP-binding/permease | 336                            | 0.82781              | Lactococcus garvieae                | Carbohydrates (128)                 |
|                      |                    |                             |                          |                    | 23                            |                           |                    |                    |                               |                          |                    |                    | W_Bacteria (UD020)            | 549                           | 104       | 58             | 13       | 24                                     | 22                           | 17                                  | 15                        | 13.98                          | 22.5                                | 30.54                               | 0                                   | F_bin23                      | 28                                  | 0.00278                             | Mobile element protein, putative    | 1180                                | 0.34136                        | Micrococcus          | Carbohydrates (128)                 |                                     |
|                      |                    |                             |                          |                    | gowning area (UR)             |                           |                    |                    |                               |                          |                    |                    | 1                             | W_Bacteria (UD020)            | 549       | 104            | 58       | 97                                     | 6                            | 0                                   | 0                         | 0                              | 6.62                                | 0                                   | 0                                   | 0                            |                                     |                                     |                                     |                                     |                                |                      |                                     |                                     |

## Supplementary Table 3: Pan- and Core genome analysis of different built environments and species.

| pan-genomes of different built environments |       |                             |         |          |         |                     |              |             |                     |                  |
|---------------------------------------------|-------|-----------------------------|---------|----------|---------|---------------------|--------------|-------------|---------------------|------------------|
| genome bin                                  | CDS   | CDS (without artefact fam.) | Pan CDS | Core CDS | Var CDS | Strain specific CDS | Core CDS (%) | Var CDS (%) | Strain spe. CDS (%) | Excluded CDS (%) |
| CR8 bin_21                                  | 4642  | 4642                        | 4642    | 5        | 4637    | 4600                | 0.108        | 99.892      | 99.095              | 0                |
| CR8 bin_33                                  | 5238  | 5238                        | 5238    | 3        | 5235    | 5200                | 0.057        | 99.943      | 99.275              | 0                |
| CR8 bin_8                                   | 3070  | 3070                        | 3070    | 3        | 3067    | 3063                | 0.098        | 99.902      | 99.772              | 0                |
| F bin_15                                    | 5169  | 5169                        | 5169    | 4        | 5165    | 712                 | 0.077        | 99.923      | 13.774              | 0                |
| F bin_23                                    | 10627 | 10627                       | 10627   | 7        | 10620   | 2551                | 0.066        | 99.934      | 24.005              | 0                |
| F bin_31                                    | 7567  | 7567                        | 7567    | 2        | 7565    | 1563                | 0.026        | 99.974      | 20.655              | 0                |
| F bin_34                                    | 2183  | 2183                        | 2183    | 2        | 2181    | 188                 | 0.092        | 99.908      | 8.512               | 0                |
| F bin_35                                    | 6345  | 6345                        | 6345    | 5        | 6340    | 2926                | 0.079        | 99.921      | 46.115              | 0                |
| F_plus bin_10                               | 2695  | 2695                        | 2695    | 2        | 2693    | 468                 | 0.074        | 99.926      | 17.365              | 0                |
| F_plus bin_13                               | 4170  | 4170                        | 4170    | 1        | 4169    | 1563                | 0.024        | 99.976      | 37.482              | 0                |
| F_plus bin_14                               | 2762  | 2762                        | 2762    | 3        | 2759    | 289                 | 0.109        | 99.891      | 10.463              | 0                |
| F_plus bin_18                               | 7064  | 7064                        | 7064    | 3        | 7061    | 1381                | 0.042        | 99.958      | 19.55               | 0                |
| F_plus bin_23                               | 2222  | 2222                        | 2222    | 3        | 2219    | 205                 | 0.135        | 99.865      | 9.226               | 0                |
| F_plus bin_30                               | 6136  | 6136                        | 6136    | 1        | 6135    | 6042                | 0.016        | 99.984      | 98.468              | 0                |
| F_plus bin_4                                | 9563  | 9563                        | 9563    | 6        | 9557    | 6038                | 0.063        | 99.937      | 63.139              | 0                |
| F_plus bin_9                                | 8301  | 8301                        | 8301    | 2        | 8299    | 1626                | 0.024        | 99.976      | 19.588              | 0                |
| ICU bin_18                                  | 6265  | 6265                        | 6265    | 8        | 6257    | 6167                | 0.128        | 99.872      | 98.436              | 0                |
| ICU bin_24                                  | 3951  | 3951                        | 3951    | 8        | 3943    | 3861                | 0.202        | 99.798      | 97.722              | 0                |
| ICU bin_3                                   | 2826  | 2826                        | 2826    | 6        | 2820    | 2816                | 0.212        | 99.788      | 99.646              | 0                |
| L bin_0                                     | 3892  | 3892                        | 3892    | 5        | 3887    | 711                 | 0.128        | 99.872      | 18.268              | 0                |
| L bin_10                                    | 2265  | 2265                        | 2265    | 5        | 2260    | 156                 | 0.221        | 99.779      | 6.887               | 0                |
| L bin_17                                    | 5420  | 5419                        | 5419    | 3        | 5416    | 1181                | 0.055        | 99.945      | 21.794              | 0                |
| L_plus bin_11                               | 2544  | 2544                        | 2544    | 5        | 2539    | 144                 | 0.197        | 99.803      | 5.66                | 0                |
| L_plus bin_16                               | 4973  | 4971                        | 4971    | 4        | 4967    | 954                 | 0.08         | 99.92       | 19.191              | 0                |
| L_plus bin_6                                | 3608  | 3608                        | 3608    | 4        | 3604    | 523                 | 0.111        | 99.889      | 14.496              | 0                |
| P bin_10                                    | 3488  | 3488                        | 3488    | 4        | 3484    | 901                 | 0.115        | 99.885      | 25.831              | 0                |
| P bin_14                                    | 6196  | 6196                        | 6196    | 4        | 6192    | 1000                | 0.065        | 99.935      | 16.139              | 0                |
| P bin_15                                    | 4987  | 4987                        | 4987    | 6        | 4981    | 1473                | 0.12         | 99.88       | 29.537              | 0                |
| P bin_18                                    | 2975  | 2975                        | 2975    | 5        | 2970    | 709                 | 0.168        | 99.832      | 23.832              | 0                |
| P bin_21                                    | 2281  | 2281                        | 2281    | 5        | 2276    | 202                 | 0.219        | 99.781      | 8.856               | 0                |
| P_plus bin_10                               | 2109  | 2109                        | 2109    | 4        | 2105    | 153                 | 0.19         | 99.81       | 7.255               | 0                |
| P_plus bin_13                               | 3026  | 3026                        | 3026    | 4        | 3022    | 755                 | 0.132        | 99.868      | 24.95               | 0                |
| P_plus bin_16                               | 3130  | 3130                        | 3130    | 4        | 3126    | 568                 | 0.128        | 99.872      | 18.147              | 0                |
| P_plus bin_3                                | 6021  | 6021                        | 6021    | 5        | 6016    | 864                 | 0.083        | 99.917      | 14.35               | 0                |
| P_plus bin_5                                | 5086  | 5086                        | 5086    | 6        | 5080    | 1626                | 0.118        | 99.882      | 31.97               | 0                |
| UR bin_18                                   | 4216  | 4216                        | 4216    | 0        | 4216    | 4096                | 0            | 100         | 97.154              | 0                |
| UR bin_24                                   | 3332  | 3331                        | 3331    | 0        | 3331    | 3325                | 0            | 100         | 99.92               | 0                |
| UR bin_26                                   | 10242 | 10242                       | 10242   | 0        | 10242   | 10061               | 0            | 100         | 98.233              | 0                |
| UR bin_32                                   | 2545  | 2545                        | 2545    | 0        | 2545    | 2504                | 0            | 100         | 98.389              | 0                |
| UR bin_33                                   | 7639  | 7639                        | 7639    | 0        | 7639    | 7504                | 0            | 100         | 98.233              | 0                |
| UR bin_41                                   | 6116  | 6116                        | 6116    | 0        | 6116    | 6037                | 0            | 100         | 98.708              | 0                |
| UR bin_9                                    | 846   | 843                         | 843     | 0        | 843     | 793                 | 0            | 100         | 94.069              | 0                |

  

| pan-genome of Acinetobacter |      |                             |         |          |         |                     |              |             |                     |                  |
|-----------------------------|------|-----------------------------|---------|----------|---------|---------------------|--------------|-------------|---------------------|------------------|
| genome bin                  | CDS  | CDS (without artefact fam.) | Pan CDS | Core CDS | Var CDS | Strain specific CDS | Core CDS (%) | Var CDS (%) | Strain spe. CDS (%) | Excluded CDS (%) |
| ICU bin_24                  | 3951 | 3951                        | 3951    | 1542     | 2409    | 784                 | 39.028       | 60.972      | 19.843              | 0                |
| CR8 bin_21                  | 4642 | 4642                        | 4642    | 1716     | 2926    | 366                 | 36.967       | 63.033      | 7.885               | 0                |
| F_plus bin_30               | 6136 | 6136                        | 6136    | 2209     | 3927    | 3157                | 36.001       | 63.999      | 51.45               | 0                |
| UR bin_33                   | 7639 | 7639                        | 7639    | 1802     | 5837    | 2857                | 23.589       | 76.411      | 37.4                | 0                |

  

| pan-genome of confined built environments |       |                             |         |          |         |                     |              |             |                     |                  |
|-------------------------------------------|-------|-----------------------------|---------|----------|---------|---------------------|--------------|-------------|---------------------|------------------|
| genome bin                                | CDS   | CDS (without artefact fam.) | Pan CDS | Core CDS | Var CDS | Strain specific CDS | Core CDS (%) | Var CDS (%) | Strain spe. CDS (%) | Excluded CDS (%) |
| CR8 bin_8                                 | 3070  | 3070                        | 3070    | 0        | 3070    | 559                 | 0            | 100         | 18.208              | 0                |
| CR8 bin_21                                | 4642  | 4642                        | 4642    | 0        | 4642    | 410                 | 0            | 100         | 8.832               | 0                |
| CR8 bin_33                                | 5238  | 5238                        | 5238    | 0        | 5238    | 3575                | 0            | 100         | 68.251              | 0                |
| UR bin_9                                  | 846   | 843                         | 843     | 0        | 843     | 766                 | 0            | 100         | 90.866              | 0                |
| UR bin_18                                 | 4216  | 4216                        | 4216    | 0        | 4216    | 4093                | 0            | 100         | 97.083              | 0                |
| UR bin_24                                 | 3332  | 3331                        | 3331    | 0        | 3331    | 970                 | 0            | 100         | 29.12               | 0                |
| UR bin_26                                 | 10242 | 10242                       | 10242   | 0        | 10242   | 10001               | 0            | 100         | 97.647              | 0                |
| UR bin_32                                 | 2545  | 2545                        | 2545    | 0        | 2545    | 2503                | 0            | 100         | 98.35               | 0                |
| UR bin_33                                 | 7639  | 7639                        | 7639    | 0        | 7639    | 2988                | 0            | 100         | 39.115              | 0                |
| UR bin_41                                 | 6116  | 6116                        | 6116    | 0        | 6116    | 4189                | 0            | 100         | 68.492              | 0                |
| ICU bin_3                                 | 2826  | 2826                        | 2826    | 0        | 2826    | 478                 | 0            | 100         | 16.914              | 0                |
| ICU bin_18                                | 6265  | 6265                        | 6265    | 0        | 6265    | 5979                | 0            | 100         | 95.435              | 0                |
| ICU bin_24                                | 3951  | 3951                        | 3951    | 0        | 3951    | 853                 | 0            | 100         | 21.589              | 0                |

  

| pan-genome of unrestricted built environments |       |                             |         |          |         |                     |              |             |                     |                  |
|-----------------------------------------------|-------|-----------------------------|---------|----------|---------|---------------------|--------------|-------------|---------------------|------------------|
| genome bin                                    | CDS   | CDS (without artefact fam.) | Pan CDS | Core CDS | Var CDS | Strain specific CDS | Core CDS (%) | Var CDS (%) | Strain spe. CDS (%) | Excluded CDS (%) |
| F bin_15                                      | 5169  | 5169                        | 5169    | 0        | 5169    | 712                 | 0            | 100         | 13.774              | 0                |
| F bin_23                                      | 10627 | 10627                       | 10627   | 0        | 10627   | 2539                | 0            | 100         | 23.892              | 0                |
| F bin_31                                      | 7567  | 7566                        | 7566    | 0        | 7566    | 953                 | 0            | 100         | 12.596              | 0                |
| F bin_34                                      | 2183  | 2183                        | 2183    | 0        | 2183    | 103                 | 0            | 100         | 4.718               | 0                |
| F bin_35                                      | 6345  | 6345                        | 6345    | 0        | 6345    | 2921                | 0            | 100         | 46.036              | 0                |
| F_plus bin_4                                  | 9563  | 9563                        | 9563    | 0        | 9563    | 5943                | 0            | 100         | 62.146              | 0                |
| F_plus bin_9                                  | 8301  | 8301                        | 8301    | 0        | 8301    | 1620                | 0            | 100         | 19.516              | 0                |
| F_plus bin_10                                 | 2695  | 2695                        | 2695    | 0        | 2695    | 458                 | 0            | 100         | 16.994              | 0                |
| F_plus bin_13                                 | 4170  | 4170                        | 4170    | 0        | 4170    | 1563                | 0            | 100         | 37.482              | 0                |
| F_plus bin_14                                 | 2762  | 2762                        | 2762    | 0        | 2762    | 289                 | 0            | 100         | 10.463              | 0                |
| F_plus bin_18                                 | 7064  | 7064                        | 7064    | 0        | 7064    | 878                 | 0            | 100         | 12.429              | 0                |
| F_plus bin_23                                 | 2222  | 2222                        | 2222    | 0        | 2222    | 111                 | 0            | 100         | 4.995               | 0                |
| F_plus bin_30                                 | 6136  | 6136                        | 6136    | 0        | 6136    | 5965                | 0            | 100         | 97.213              | 0                |
| P bin_10                                      | 3488  | 3488                        | 3488    | 0        | 3488    | 896                 | 0            | 100         | 25.688              | 0                |
| P bin_14                                      | 6196  | 6195                        | 6195    | 0        | 6195    | 549                 | 0            | 100         | 8.862               | 0                |
| P bin_15                                      | 4987  | 4987                        | 4987    | 0        | 4987    | 1458                | 0            | 100         | 29.236              | 0                |
| L_plus bin_6                                  | 3608  | 3608                        | 3608    | 0        | 3608    | 514                 | 0            | 100         | 14.246              | 0                |
| L_plus bin_11                                 | 2544  | 2544                        | 2544    | 0        | 2544    | 65                  | 0            | 100         | 2.555               | 0                |
| L_plus bin_16                                 | 4973  | 4971                        | 4971    | 0        | 4971    | 437                 | 0            | 100         | 8.791               | 0                |
| P bin_18                                      | 2975  | 2975                        | 2975    | 0        | 2975    | 708                 | 0            | 100         | 23.798              | 0                |
| P bin_21                                      | 2281  | 2281                        | 2281    | 0        | 2281    | 54                  | 0            | 100         | 2.367               | 0                |
| P_plus bin_3                                  | 6021  | 6021                        | 6021    | 0        | 6021    | 475                 | 0            | 100         | 7.889               | 0                |
| P_plus bin_5                                  | 5086  | 5086                        | 5086    | 0        | 5086    | 1624                | 0            | 100         | 31.931              | 0                |
| P_plus bin_10                                 | 2109  | 2109                        | 2109    | 0        | 2109    | 69                  | 0            | 100         | 3.272               | 0                |
| P_plus bin_13                                 | 3026  | 3026                        | 3026    | 0        | 3026    | 751                 | 0            | 100         | 24.818              | 0                |
| P_plus bin_16                                 | 3130  | 3130                        | 3130    | 0        | 3130    | 561                 | 0            | 100         | 17.923              | 0                |
| L bin_0                                       | 3892  | 3892                        | 3892    | 0        | 3892    | 680                 | 0            | 100         | 17.472              | 0                |
| L bin_10                                      | 2265  | 2265                        | 2265    | 0        | 2265    | 69                  | 0            | 100         | 3.046               | 0                |
| L bin_17                                      | 5420  | 5419                        | 5419    | 0        | 5419    | 598                 | 0            | 100         | 11.035              | 0                |

Supplementary Table 4: A list of cleaning and disinfection reagents applied for various surfaces and purposes in the sampled built environments.

| built environment    |                      |                    |                                                     |                                                                                                                   | gowning area (UR)    |                                                | cleanroom (CR)       |                                                                             |
|----------------------|----------------------|--------------------|-----------------------------------------------------|-------------------------------------------------------------------------------------------------------------------|----------------------|------------------------------------------------|----------------------|-----------------------------------------------------------------------------|
| public buildings (L) | public houses (P)    | private houses (F) | intensive care unit (ICU)                           |                                                                                                                   | surfaces             | surfaces                                       | surfaces             | surfaces                                                                    |
| floors               | mechanically (broom) | floors             | natural soaps                                       | floors                                                                                                            | all-purpose cleaners | isopropanol 70%<br>JAMINAL PLUS<br>KLERCIDE-CR | isopropanol 70%      | isopropanol 70%<br>JAMINAL PLUS<br>KLERCIDE-CR                              |
|                      |                      |                    | hand disinfection                                   | Desderman pure<br>Desmanol pure<br>Descoderm<br>Skinman Soft Protect<br>Sterillium classic pure<br>Sterillium LSG | devices and products | isopropanol 70%                                | devices and products | isopropanol 70%<br>vapor phase H <sub>2</sub> O <sub>2</sub><br>autoclaving |
|                      |                      |                    | skin antiseptic                                     | Kodan forte (colored)<br>Kodan forte (colorless)<br>Betaseptic<br>Betaisodona standardized solution               |                      |                                                |                      |                                                                             |
|                      |                      |                    | mucosal antiseptic                                  | Octenisept solution<br>Betaisodona standardized solution                                                          |                      |                                                |                      |                                                                             |
|                      |                      |                    | surface disinfection                                | Incidin Plus                                                                                                      |                      |                                                |                      |                                                                             |
|                      |                      |                    | rapid disinfection (containing alcohol)             | Incidin Liquid                                                                                                    |                      |                                                |                      |                                                                             |
|                      |                      |                    | rapid disinfection (nonalcoholic)                   | Acryl-des disinfection tissues<br>Acrylan                                                                         |                      |                                                |                      |                                                                             |
|                      |                      |                    | desinfectant for instruments (manually preparation) | Gigasept Instru AF<br>Sekusept plus<br>Sekusept active                                                            |                      |                                                |                      |                                                                             |

Supplementary Table 5: A list of cleaning and disinfection reagents including the exposure time applied for certain cases in the ICU at the state hospital in Graz, Austria.

| disease / germ                                                                                                                                 | range of application                                                                        |                         |                            |
|------------------------------------------------------------------------------------------------------------------------------------------------|---------------------------------------------------------------------------------------------|-------------------------|----------------------------|
|                                                                                                                                                | hand disinfection                                                                           | surface disinfection    |                            |
|                                                                                                                                                |                                                                                             | rapid disinfection      | routine disinfection       |
| Norovirus                                                                                                                                      | Desderman pure (30 sec)<br>Desmanol pure (30 sec)                                           | Incidin liquid (10 min) | Incidin active 1% (1 hr)   |
| Adenovirus                                                                                                                                     | Desderman pure (30 sec)                                                                     | Incidin liquid (10 min) | Incidin plus 1% (1 hr)     |
| Rotavirus                                                                                                                                      | Desderman pure (30 sec)<br>Desmanol pure (30 sec)<br>Descoderm (30 sec)                     | Incidin liquid (5 min)  | Incidin plus 0.5% (1 hr)   |
| <i>Clostridium difficile</i>                                                                                                                   | standard desinfectants according to cleaning and disinfection protocols                     |                         | Incidin active 2% (15 min) |
| gas gangrene                                                                                                                                   | standard desinfectants according to cleaning and disinfection protocols (in-depth cleaning) |                         |                            |
| tuberculosis                                                                                                                                   | standard desinfectants applied 2 times according to cleaning and disinfection protocols     |                         | Incidin plus 0.5% (1 hr)   |
| MRE (MRSA, ESBL etc.)<br>hepatitides, HIV<br>influenza A, B<br>measles, mumps<br>Meningococci<br>pertussis<br>Salmonellae<br>SARS<br>varicella | standard desinfectants according to cleaning and disinfection protocols                     |                         |                            |

Supplementary Table 6: Complete list of all primers used in the study.

| primer name | target region                  | application   | primer sequence      |
|-------------|--------------------------------|---------------|----------------------|
| 515f        | V4 region of the 16S rRNA gene | 16S amplicons | GTGCCAGCMGCCGCGGTAA  |
| 806r        |                                |               | GGACTACHVGGGTWTCTAAT |
| 515F        |                                | qPCR          | GTGCCAGCAGCCGC       |
| 927R        |                                |               | CCCGTCAATYMTTGTGAGTT |

Supplementary Table 7: Summary on all quality reads of the shotgun metagenomics dataset.

| samples | sequences (per each read) | sequence length | %GC | read | Phred Score (average quality per read; seq/q) |
|---------|---------------------------|-----------------|-----|------|-----------------------------------------------|
| CR8     | 6.71E+07                  |                 | 44  | 1    | >2.5E+07/37                                   |
|         |                           |                 |     | 2    | >2.0E+07/37                                   |
| UR      | 5.35E+07                  |                 | 48  | 1    | >1.8E+07/37                                   |
|         |                           |                 |     | 2    | >1.4E+07/37                                   |
| ICU     | 3.30E+07                  |                 | 42  | 1    | >1.6E+07/37                                   |
|         |                           |                 |     | 2    | >1.4E+07/37                                   |
| L       | 3.03E+07                  |                 | 60  | 1    | >8.0E+06/36                                   |
|         |                           |                 |     | 2    | >8.0E+06/36                                   |
| L_plus  | 3.17E+07                  | 50-150          | 62  | 1    | >9.0E+06/36                                   |
|         |                           |                 |     | 2    | >8.0E+06/36                                   |
| P       | 3.32E+07                  |                 | 60  | 1    | >1.0E+07/36                                   |
|         |                           |                 |     | 2    | >7.0E+06/36                                   |
| P_plus  | 3.28E+07                  |                 | 61  | 1    | >9.0E+06/36                                   |
|         |                           |                 | 60  | 2    | >7.0E+06/36                                   |
| F       | 3.97E+07                  |                 | 45  | 1    | >1.4E+07/37                                   |
|         |                           |                 |     | 2    | >1.2E+07/37                                   |
| F_plus  | 3.69E+07                  |                 | 46  | 1    | >1.2E+07/37                                   |
|         |                           |                 |     | 2    | >1.2E+07/37                                   |

Supplementary Table 8: Summary of all contigs and scaffolds after assembly of the shotgun metagenomics dataset.

| Contigs >= 100 nt | Number  | Total length | Average | N50 | Median | Largest |
|-------------------|---------|--------------|---------|-----|--------|---------|
| CR8               | 8603965 | 2010442497   | 233     | 251 | 173    | 88313   |
| UR                | 6781605 | 1285900173   | 189     | 169 | 148    | 77951   |
| ICU               | 5846714 | 1194191177   | 204     | 204 | 162    | 152957  |
| L                 | 3719862 | 616578790    | 165     | 144 | 140    | 112186  |
| L_plus            | 3595693 | 606816993    | 168     | 146 | 141    | 192834  |
| P                 | 3609403 | 583352985    | 161     | 144 | 140    | 260735  |
| P_plus            | 3529598 | 569566003    | 161     | 145 | 140    | 260738  |
| F                 | 3013516 | 528935438    | 175     | 143 | 138    | 128864  |
| F_plus            | 3103321 | 529882363    | 170     | 142 | 138    | 98570   |

| Contigs >= 500 nt | Number | Total length | Average | N50  | Median | Largest |
|-------------------|--------|--------------|---------|------|--------|---------|
| ICU               | 98994  | 73962331     | 747     | 625  | 574    | 152957  |
| CR8               | 468389 | 338833151    | 723     | 667  | 613    | 88313   |
| UR                | 103191 | 129616359    | 1256    | 1523 | 713    | 77951   |
| L_plus            | 50525  | 64061830     | 1267    | 1449 | 771    | 192834  |
| P                 | 31304  | 47448008     | 1515    | 2299 | 766    | 260735  |
| P_plus            | 29900  | 44378695     | 1484    | 2206 | 748    | 260738  |
| F                 | 59104  | 91192370     | 1542    | 2084 | 870    | 128864  |
| F_plus            | 54071  | 82752023     | 1530    | 2032 | 867    | 98570   |
| L                 | 50240  | 60661672     | 1207    | 1324 | 750    | 112186  |

| Scaffolds >= 100 nt | Number  | Total length | Average | N50 | Median | Largest |
|---------------------|---------|--------------|---------|-----|--------|---------|
| ICU                 | 5846470 | 1194230266   | 204     | 204 | 162    | 152957  |
| CR8                 | 8602774 | 2010603824   | 233     | 251 | 173    | 88313   |
| UR                  | 6779560 | 1286163090   | 189     | 169 | 148    | 101382  |
| L_plus              | 3594500 | 606967359    | 168     | 146 | 141    | 258085  |
| P                   | 3608497 | 583483719    | 161     | 144 | 140    | 260735  |
| P_plus              | 3528733 | 569693266    | 161     | 145 | 140    | 260738  |
| F                   | 3011212 | 529221167    | 175     | 143 | 138    | 128864  |
| F_plus              | 3101251 | 530124777    | 170     | 142 | 138    | 98570   |
| L                   | 3718903 | 616698401    | 165     | 144 | 140    | 155114  |

| Scaffolds >= 500 nt | Number | Total length | Average | N50  | Median | Largest |
|---------------------|--------|--------------|---------|------|--------|---------|
| ICU                 | 98764  | 74008162     | 749     | 626  | 574    | 152957  |
| CR8                 | 467352 | 339066479    | 725     | 668  | 612    | 88313   |
| UR                  | 101444 | 130012967    | 1281    | 1592 | 711    | 101382  |
| L_plus              | 49546  | 64308268     | 1297    | 1520 | 772    | 258085  |
| P                   | 30472  | 47613011     | 1562    | 2510 | 763    | 260735  |
| P_plus              | 29106  | 44538821     | 1530    | 2402 | 744    | 260738  |
| F                   | 57173  | 91638271     | 1602    | 2264 | 872    | 128864  |
| F_plus              | 52403  | 83164916     | 1587    | 2194 | 871    | 98570   |
| L                   | 49474  | 60867124     | 1230    | 1371 | 751    | 155114  |

Supplementary Table 9: Settings for selected bioinformatic tools.

| software tool    | application                  | settings                                                                                                                                                                                                                                                                                                                            |
|------------------|------------------------------|-------------------------------------------------------------------------------------------------------------------------------------------------------------------------------------------------------------------------------------------------------------------------------------------------------------------------------------|
| Trimmomatic-0.32 | data filtering               | MIN_LENGTH=50, TAILCROP=0, HEADCROP=0, ILLUMINACLIP:TruSeq3-PE-2.fa:2:30:10:4:true, SLIDINGWINDOW: 5:20                                                                                                                                                                                                                             |
| MEGAN 5          | single read visualization    | files: paired_reads=yes, max_matches_per_read=100; GI Maps: gi_taxid-March2015X.bin, gi2kegg-Feb2015X.bin, gi2seed.map; LCA Params: min_score=50, max_expected=0.01, top_percent=10, min_support_percent=0, min_support=1, embed_in_main_file                                                                                       |
| Ray Meta-2.3.1   | assembly                     | K=31, MINLEN=1000, MINCOV=5, READLEN=150                                                                                                                                                                                                                                                                                            |
| CONCOCT-0.4.0    | binning                      | clusters=400, epsilon=1e-06, iterations=500, kmer_length=4, length_threshold=1000, pca_components=0.9, read_length=100, seed=1, total_percentage_pca=90                                                                                                                                                                             |
| MaxBin-1.4.2     | binning                      | min_contig_length=1000, marker genes 107,                                                                                                                                                                                                                                                                                           |
| Amphora2         | taxonomic assignment         | support_factor=(2/3.0), min_confidence=0.8, MIN_MARKERPERCENTAGE=0.2, NUM_BACT_MARKERS=31, NUM_ARCH_MARKERS=104                                                                                                                                                                                                                     |
| dRep-0.5.7       | genome comparisons           | MASH_sketch=1000, P_ani=0.9, S_algorithm='ANIn', S_ani=0.99, SkipMash=False, SkipSecondary=False, cent_index=None, clusterAlg='average', cov_thresh=0.1, coverage_method='larger', dry=False, n_PRESET='normal', operation='compare_wf', overwrite=False, processors=6, run_tax=False, warn_aln=0.25, warn_dist=0.25, warn_sim=0.98 |
| iRep-1.1         | replication rates of genomes | Line rate= 6, Lines per side= 1, Offset rate= 4, FTable chars= 10, Strings= unpacked, len divisor= 4, Difference-cover sample period= 1024, Endianness= little, Actual local endianness= little, Random seed= 0, Sizeofs= void*=8, int=4, long=8, size_t=8                                                                          |

## Supplementary Table 10: Summary of applied statistics on the 16S rRNA gene amplicon dataset.

summary of applied statistics (16S rRNA gene amplicons)

| Test                                            | grouping category                                                                                         | metric            | significance                         | details                                                                                                                                                                                                                                                                                                                        |        |
|-------------------------------------------------|-----------------------------------------------------------------------------------------------------------|-------------------|--------------------------------------|--------------------------------------------------------------------------------------------------------------------------------------------------------------------------------------------------------------------------------------------------------------------------------------------------------------------------------|--------|
| MRPP                                            | environmental confinement<br>sampling location / surface                                                  | weighted unfrac   | 0.001                                | A: 0.1618, delta 0.4224 of 0.504                                                                                                                                                                                                                                                                                               |        |
|                                                 |                                                                                                           |                   | 0.001                                | A: 0.1583, delta 0.4242 of 0.504                                                                                                                                                                                                                                                                                               |        |
|                                                 | environmental confinement<br>sampling location                                                            | unweighted unfrac | 0.001                                | A: 0.1392, delta 0.6759 of 0.7851                                                                                                                                                                                                                                                                                              |        |
|                                                 |                                                                                                           |                   | 0.001                                | A: 0.1252, delta 0.6868 of 0.7851                                                                                                                                                                                                                                                                                              |        |
| adonis                                          | environmental confinement                                                                                 |                   | 0.001                                | R2: 0.30668                                                                                                                                                                                                                                                                                                                    |        |
|                                                 | type of built environment                                                                                 |                   | 0.001                                | R2: 0.51265                                                                                                                                                                                                                                                                                                                    |        |
|                                                 | sampling location / surface                                                                               |                   | 0.001                                | R2: 0.30079                                                                                                                                                                                                                                                                                                                    |        |
|                                                 | surface material                                                                                          |                   | 0.001                                | R2: 0.41641                                                                                                                                                                                                                                                                                                                    |        |
| ANOSIM                                          | environmental confinement                                                                                 |                   | 0.001                                | R: 0.633738272592444                                                                                                                                                                                                                                                                                                           |        |
|                                                 | type of built environment                                                                                 |                   | 0.001                                | R: 0.607909664422414                                                                                                                                                                                                                                                                                                           |        |
|                                                 | sampling location / surface                                                                               |                   | 0.001                                | R: 0.603552220205951                                                                                                                                                                                                                                                                                                           |        |
|                                                 | surface material                                                                                          |                   | 0.001                                | R: 0.380902465808126                                                                                                                                                                                                                                                                                                           |        |
| two-sided<br>two sample<br>Student's t<br>tests | environmental confinement<br>type of built environment<br>sampling location / surface<br>surface material | weighted unfrac   | distances<br>(maximum to<br>minimum) | controlled vs. moderate controlled 0.6 > moderate controlled vs. uncontrolled 0.59 > controlled vs. Uncontrolled 0.4<br> CU_floor_vs._public_buildings_wp 0.65; public_house_vs._public_buildings_wp 0.36<br>table_vs._floor 0.6; device_vs._table 0.37<br>metal_polymer_vs._concrete_tiles 0.68; polymer_tiles_vs._stone 0.21 |        |
|                                                 |                                                                                                           |                   |                                      |                                                                                                                                                                                                                                                                                                                                |        |
| Mantel<br>correlogram                           | humidity (H)                                                                                              |                   |                                      |                                                                                                                                                                                                                                                                                                                                |        |
|                                                 | temperature (°C)                                                                                          |                   |                                      |                                                                                                                                                                                                                                                                                                                                |        |
|                                                 | room volume (vol)                                                                                         |                   |                                      |                                                                                                                                                                                                                                                                                                                                |        |
|                                                 | surface area (surf)                                                                                       |                   |                                      |                                                                                                                                                                                                                                                                                                                                |        |
|                                                 | room area (room)                                                                                          |                   |                                      |                                                                                                                                                                                                                                                                                                                                |        |
|                                                 | surface material (m)                                                                                      |                   |                                      |                                                                                                                                                                                                                                                                                                                                |        |
|                                                 | geographic latitude (la)                                                                                  |                   |                                      |                                                                                                                                                                                                                                                                                                                                |        |
|                                                 | geographic longitude (lo)                                                                                 |                   |                                      |                                                                                                                                                                                                                                                                                                                                |        |
| sea level (sl)                                  |                                                                                                           |                   |                                      |                                                                                                                                                                                                                                                                                                                                |        |
| room height (h)                                 |                                                                                                           |                   |                                      |                                                                                                                                                                                                                                                                                                                                |        |
| BEST<br>(BioEnv)                                | environmental variables                                                                                   | Bray-Curtis       |                                      |                                                                                                                                                                                                                                                                                                                                |        |
|                                                 | sample                                                                                                    |                   |                                      |                                                                                                                                                                                                                                                                                                                                | 0.9773 |
|                                                 | sample,lo                                                                                                 |                   |                                      |                                                                                                                                                                                                                                                                                                                                | 0.9586 |
|                                                 | sample,la,lo                                                                                              |                   |                                      |                                                                                                                                                                                                                                                                                                                                | 0.9705 |
|                                                 | sample,la,lo,sl                                                                                           |                   |                                      |                                                                                                                                                                                                                                                                                                                                | 0.9425 |
|                                                 | sample,vol,la,lo,sl                                                                                       |                   |                                      |                                                                                                                                                                                                                                                                                                                                | 0.9043 |
|                                                 | sample,vol,H,la,lo,sl                                                                                     |                   |                                      |                                                                                                                                                                                                                                                                                                                                | 0.8846 |
|                                                 | sample,surf,vol,H,la,lo,sl                                                                                |                   |                                      |                                                                                                                                                                                                                                                                                                                                | 0.8659 |
|                                                 | sample,surf,h,vol,H,la,lo,sl                                                                              |                   |                                      |                                                                                                                                                                                                                                                                                                                                | 0.8355 |
|                                                 | sample,surf,room,h,vol,H,la,lo,sl                                                                         |                   |                                      |                                                                                                                                                                                                                                                                                                                                | 0.8044 |
|                                                 | sample,surf,room,h,vol,H,C,la,lo,sl                                                                       |                   |                                      |                                                                                                                                                                                                                                                                                                                                | 0.7738 |
|                                                 | sample,surf,room,h,vol,m,H,C,la,lo,sl                                                                     |                   |                                      |                                                                                                                                                                                                                                                                                                                                | 0.7518 |

Supplementary Table 11: Summary of applied statistics on predicted functions from the 16S rRNA gene amplicon dataset with PICRUST.

summary of applied statistics (PICRUST predictions of 16S rRNA gene amplicons)

| Test                                             | grouping category                | metric      | significance                                                        | details                                                                                                              |  |
|--------------------------------------------------|----------------------------------|-------------|---------------------------------------------------------------------|----------------------------------------------------------------------------------------------------------------------|--|
| MRPP                                             | environmental confinement        | Bray-Curtis | 0.001                                                               | A: 0.181, delta 0.06969 of 0.08509                                                                                   |  |
|                                                  | type of built environment        |             | 0.001                                                               | A: 0.3074, delta 0.05893 of 0.08509                                                                                  |  |
|                                                  | sampling location / surface      |             | 0.001                                                               | A: 0.2373, delta 0.0649 of 0.08509                                                                                   |  |
|                                                  | surface material                 |             | 0.001                                                               | A: 0.2896, delta 0.06045 of 0.08509                                                                                  |  |
| adonis                                           | environmental confinement        |             | 0.001                                                               | R2: 0.32734                                                                                                          |  |
|                                                  | type of built environment        |             | 0.001                                                               | R2: 0.55937                                                                                                          |  |
|                                                  | sampling location / surface      |             | 0.001                                                               | R2: 0.43945                                                                                                          |  |
|                                                  | surface material                 |             | 0.001                                                               | R2: 0.51541                                                                                                          |  |
| ANOSIM                                           | environmental confinement        |             | 0.001                                                               | R: 0.482880658436213                                                                                                 |  |
|                                                  | type of built environment        |             | 0.001                                                               | R: 0.508214886053013                                                                                                 |  |
|                                                  | sampling location / surface      |             | 0.001                                                               | R: 0.740354908750047                                                                                                 |  |
|                                                  | surface material                 |             | 0.001                                                               | R: 0.395628422683383                                                                                                 |  |
| two-sided<br>two sample<br>Student's t-<br>tests | environmental confinement        |             | distances<br>(maximum to<br>minimum)                                | moderate controlled vs. uncontrolled 0.1 > moderate controlled vs. controlled 0.1 > controlled vs. uncontrolled 0.06 |  |
|                                                  | type of built environment        |             |                                                                     | ICU_workplace_vs._private_house 0.14; gowning_area_vs._public_house 0.04                                             |  |
| Mantel<br>correlogram                            | sampling location / surface      |             | table_vs._floor 0.12; device_vs._table 0.06                         |                                                                                                                      |  |
|                                                  | surface material                 |             | polymer_tiles_vs._furnished_wood 0.15; polymer_tiles_vs._stone 0.04 |                                                                                                                      |  |
|                                                  | room volume (vol)                |             |                                                                     |                                                                                                                      |  |
|                                                  | humidity (H)                     |             |                                                                     |                                                                                                                      |  |
|                                                  | temperature (°C)                 |             |                                                                     |                                                                                                                      |  |
|                                                  | room area (room)                 |             |                                                                     |                                                                                                                      |  |
|                                                  | surface area (surf)              |             |                                                                     |                                                                                                                      |  |
|                                                  | surface material (m)             |             |                                                                     |                                                                                                                      |  |
| BEST<br>(BioEnv)                                 | geographic latitude (la)         | 0.8918      |                                                                     |                                                                                                                      |  |
|                                                  | geographic longitude (lo)        | 0.8996      |                                                                     |                                                                                                                      |  |
|                                                  | sea level (sl)                   | 0.8847      |                                                                     |                                                                                                                      |  |
|                                                  | room height (h)                  | 0.8645      |                                                                     |                                                                                                                      |  |
|                                                  | environmental variables          | 0.8448      |                                                                     |                                                                                                                      |  |
|                                                  | sample                           | 0.835       |                                                                     |                                                                                                                      |  |
|                                                  | sample, vol                      | 0.8123      |                                                                     |                                                                                                                      |  |
|                                                  | sample, h, vol                   | 0.7924      |                                                                     |                                                                                                                      |  |
|                                                  | sample, surf, h, vol             | 0.7543      |                                                                     |                                                                                                                      |  |
|                                                  | sample, h, vol, la, lo           | 0.7262      |                                                                     |                                                                                                                      |  |
|                                                  | sample, surf, h, vol, la, lo, sl | 0.7024      |                                                                     |                                                                                                                      |  |



Supplementary Table 12: Read statistics of the 16S rRNA gene amplicon dataset.

| 16S rRNA gene amplicons                      |        |
|----------------------------------------------|--------|
| Number of samples                            | 61     |
| Number of OTUs (operational taxonomic units) | 10814  |
| Number of sequences                          | 837216 |

  

| Number of sequences per sample |      | Number of sequences per sample |       |
|--------------------------------|------|--------------------------------|-------|
| L5                             | 225  | ICU.d.14                       | 10228 |
| L1.PMA                         | 254  | ICU.d.10                       | 10305 |
| ICU.f.1                        | 2052 | ICU.w.19                       | 10504 |
| ICU.f.5                        | 2888 | F3.PMA                         | 10846 |
| CR.7a                          | 2928 | ICU.f.3                        | 10877 |
| ICU.f.4                        | 4424 | L1                             | 10943 |
| L8.PMA                         | 4576 | ICU.d.16                       | 11185 |
| F2.PMA                         | 5227 | ICU.d.12                       | 11408 |
| ICU.d.6                        | 5308 | L6.PMA                         | 12149 |
| F2                             | 6444 | ICU.w.21                       | 13147 |
| ICU.d.11                       | 6635 | P3.PMA                         | 13454 |
| ICU.w.23                       | 6778 | ICU.w.20                       | 14835 |
| ICU.w.18                       | 7057 | L3                             | 14896 |
| ICU.f.2                        | 7168 | L9                             | 15899 |
| UR.7                           | 7255 | L7.PMA                         | 16261 |
| L3.PMA                         | 7307 | P1.PMA                         | 18562 |
| L4.PMA                         | 7543 | CR.7b                          | 18888 |
| ICU.w.17                       | 7721 | P2.PMA                         | 19242 |
| ICU.d.15                       | 7841 | L7                             | 19359 |
| P3                             | 7920 | L6                             | 21036 |
| L5.PMA                         | 7965 | P1                             | 21321 |
| ICU.d.9                        | 8088 | L4                             | 24486 |
| ICU.w.22                       | 8221 | F1                             | 25455 |
| ICU.d.13                       | 8446 | F1.PMA                         | 25670 |
| F3                             | 8616 | L2                             | 26425 |
| ICU.d.7                        | 9243 | UR                             | 26913 |
| ICU.w.24                       | 9627 | P2                             | 27974 |
| ICU.d.8                        | 9628 | L8                             | 28344 |
|                                |      | F0                             | 28566 |
|                                |      | L9.PMA                         | 30456 |
|                                |      | F0.PMA                         | 35436 |
|                                |      | CR.8                           | 36930 |
|                                |      | L2.PMA                         | 37831 |

  

| summary of reads |           |
|------------------|-----------|
| Minimum          | 225       |
| Maximum          | 37831     |
| Median           | 10504     |
| Mean             | 13724.852 |
| Std. dev.        | 9289.725  |

## Supplementary References

1. Oberauner, L. *et al.* The ignored diversity: complex bacterial communities in intensive care units revealed by 16S pyrosequencing. *Sci. Rep.* **3**, 1413 (2013).
2. Koskinen, K. *et al.* Microbial biodiversity assessment of the European Space Agency's ExoMars 2016 mission. *Microbiome* **5**, 143 (2017).
3. Sinha, R. *et al.* Assessment of variation in microbial community amplicon sequencing by the Microbiome Quality Control (MBQC) project consortium. *Nat. Biotechnol.* **35**, 1077–1086 (2017).
4. Adams, R. I., Bateman, A. C., Bik, H. M. & Meadow, J. F. Microbiota of the indoor environment: a meta-analysis. *Microbiome* **3**, 49 (2015).
5. Chase, J. *et al.* Geography and Location Are the Primary Drivers of Office Microbiome Composition. *mSystems* **1**, 1–18 (2016).
6. Nicholson, W. L., Schuergel, A. C. & Race, M. S. Migrating microbes and planetary protection. *Trends Microbiol.* **17**, 389–392 (2009).
7. Rummel, J. D., Stabekis, P. D., Devincenzi, D. L. & Barengoltz, J. B. COSPAR'S planetary protection policy: A consolidated draft. *Adv. Sp. Res.* **30**, 1567–1571 (2002).
8. Rozov, R. *et al.* Recycler: an algorithm for detecting plasmids from *de novo* assembly graphs. *Bioinformatics* btw651 (2016). doi:10.1093/bioinformatics/btw651
9. Bankevich, A. *et al.* SPAdes: A New Genome Assembly Algorithm and Its Applications to Single-Cell Sequencing. *J. Comput. Biol.* **19**, 455–477 (2012).
10. Li, H. & Durbin, R. Fast and accurate long-read alignment with Burrows-Wheeler transform. *Bioinformatics* **26**, 589–95 (2010).
11. Zhu, W., Lomsadze, A. & Borodovsky, M. Ab initio gene identification in metagenomic sequences. *Nucleic Acids Res.* **38**, 1–15 (2010).
12. Camacho, C. *et al.* BLAST+: Architecture and applications. *BMC Bioinformatics* **10**, 421 (2009).
13. Kanehisa, M. & Goto, S. KEGG: Kyoto encyclopedia of genes and genomes. *Nucleic Acids Res.* **28**, 27–30 (2000).
14. Bairoch, A. *et al.* The Universal Protein Resource (UniProt). *Nucleic Acids Res.* **33**, 154–159 (2005).

15. Jia, B. *et al.* CARD 2017: Expansion and model-centric curation of the comprehensive antibiotic resistance database. *Nucleic Acids Res.* **45**, D566–D573 (2017).
16. Vallenet, D. *et al.* MaGe: a microbial genome annotation system supported by synteny results. *Nucleic Acids Res.* **34**, 53–65 (2006).
17. Chen, L., Zheng, D., Liu, B., Yang, J. & Jin, Q. VFDB 2016: Hierarchical and refined dataset for big data analysis - 10 years on. *Nucleic Acids Res.* **44**, D694–D697 (2016).
18. Joensen, K. G. *et al.* Real-time whole-genome sequencing for routine typing, surveillance, and outbreak detection of verotoxigenic *Escherichia coli*. *J. Clin. Microbiol.* **52**, 1501–1510 (2014).
19. Miele, V., Penel, S. & Duret, L. Ultra-fast sequence clustering from similarity networks with SiLiX. *BMC Bioinformatics* **12**, 116 (2011).
20. Cury, J., Jové, T., Touchon, M., Néron, B. & Rocha, E. P. Identification and analysis of integrons and cassette arrays in bacterial genomes. *Nucleic Acids Res.* **44**, 4539–4550 (2016).
21. Vernikos, G. S. & Parkhill, J. Interpolated variable order motifs for identification of horizontally acquired DNA: Revisiting the *Salmonella* pathogenicity islands. *Bioinformatics* **22**, 2196–2203 (2006).
22. Waack, S. *et al.* Score-based prediction of genomic islands in prokaryotic genomes using hidden Markov models. *BMC Bioinformatics* **7**, 1–12 (2006).
23. Caporaso, J. G. *et al.* QIIME allows analysis of high-throughput community sequencing data. *Nat. Methods* **7**, 335–336 (2010).
24. Bolyen, E. *et al.* QIIME 2: Reproducible, interactive, scalable, and extensible microbiome data science. *PeerJ Prepr.* (2018). doi:10.7287/peerj.preprints.27295v1
25. Schwendner, P. *et al.* Preparing for the manned Mars journey: Microbiome dynamics in the confined Mars500 habitat during simulated Mars flight and landing. *Microbiome, Submitt.* **5**, 129 (2017).
26. Mahnert, A., Haratani, M., Schmuck, M. & Berg, G. Enriching beneficial microbial diversity of indoor plants and their surrounding built environment with biostimulants. *Front. Microbiol.* (2018). doi:10.3389/fmicb.2018.02985
27. Schloss, P. D. *et al.* Introducing mothur: Open-source, platform-independent, community-supported software for describing and comparing microbial communities. *Appl. Environ. Microbiol.* **75**, 7537–7541 (2009).

28. Edgar, R. C. Search and clustering orders of magnitude faster than BLAST. *Bioinformatics* **26**, 2460–1 (2010).
29. Langille, M. G. I. *et al.* Predictive functional profiling of microbial communities using 16S rRNA marker gene sequences. *Nat. Biotechnol.* **31**, 814–21 (2013).
30. Ward, T. *et al.* BugBase Predicts Organism Level Microbiome Phenotypes. *bioRxiv* 1–19 (2017). doi:10.1101/133462
31. Shannon, P. *et al.* Cytoscape: a software environment for integrated models of biomolecular interaction networks. *Genome Res.* **13**, 2498–504 (2003).
32. Moissl-Eichinger, C. *et al.* Quo vadis? Microbial profiling revealed strong effects of cleanroom maintenance and routes of contamination in indoor environments. *Sci. Rep.* **5**, 9156 (2015).
33. Bokulich, N. A. *et al.* q2-sample-classifier: machine-learning tools for microbiome classification and regression. *bioRxiv* (2018). doi:10.1101/306167
34. Clarke, K. R. & Ainsworth, M. A method of linking multivariate community structure to environmental variables. *Mar. Ecol. Prog. Ser.* **92**, 205–219 (1993).
35. Morgan, X. C. *et al.* Dysfunction of the intestinal microbiome in inflammatory bowel disease and treatment. *Genome Biol.* **13**, R79 (2012).
36. Morton, J. T. *et al.* Balance Trees Reveal Microbial Niche Differentiation. *mSystems* **2**, 1–11 (2017).
37. Bokulich, N. A. *et al.* q2-longitudinal : Longitudinal and Paired-Sample Analyses of Microbiome Data. *mSystems* **3**, 1–9 (2018).
